# Gene Expression Profiling Reveals Progesterone-Mediated Cell Cycle and Immunoregulatory Roles of *Hoxa-10* in the Preimplantation Uterus

MYLENE W. M. YAO\*, HYUNJUNG LIM, DANIEL J. SCHUST, SUNG E. CHOE, ANNA FARAGO, YUEYUN DING, SEBASTIEN MICHAUD, GEORGE M. CHURCH, AND RICHARD L. MAAS

*Division of Genetics (M.W.M.Y., S.E.C., A.F., Y.D., S.M., R.L.M.), Department of Medicine and Department of Obstetrics and Gynecology (M.W.M.Y., D.J.S.), Brigham and Women's Hospital, Harvard Medical School, Boston, Massachusetts 02115; Departments of Obstetrics and Gynecology, and Cell Biology and Physiology (H.L.), Washington University School of Medicine, St. Louis, Missouri 63110; and Department of Genetics (S.E.C., G.M.C.), Harvard Medical School, Boston, Massachusetts 02115*

**Human infertility and recurrent pregnancy loss caused by implantation defects are poorly understood. *Hoxa-10*-deficient female mice have severe infertility and recurrent pregnancy loss due to defective uterine implantation. Gene expression profiling experiments reveal that *Hoxa-10* is an important regulator of two critical events in implantation: stromal cell proliferation and local immunosuppression. At the time of implantation, *Hoxa-10* mediates the progesterone-stimulated proliferation of uterine stromal cells. *Hoxa-10* mutants express a**

**stromal cell proliferation defect that is accompanied by quantitative or spatial alterations in the expression of two cyclin-dependent kinase inhibitor genes, *p57* and *p15*. *Hoxa-10* deficiency also leads to a severe local immunological disturbance, characterized by a polyclonal proliferation of T cells, that occurs in place of the normal progesterone-mediated immunosuppression in the preimplantation uterus. (*Molecular Endocrinology* 17: 610–627, 2003)**

**I**NFERTILITY AFFECTS MORE than 6.1 million women and their partners in the United States (1). Implantation failure due to intrinsic uterine defects is thought to span a wide clinical spectrum including spontaneous abortion, unexplained infertility, and recurrent pregnancy loss. Gene targeting in mouse models has identified several genes that are critical for implantation (reviewed in Refs. 2 and 3). A complex series of synchronized molecular interactions occur within the uterus before implantation, and between the uterus and the implanting blastocyst, both of which are required for successful implantation.

At the same time, gene targeting studies show that implantation of a healthy embryo can fail due to a defective uterine environment. Priming of the uterine stroma by progesterone (P4) is essential for the establishment of an appropriate uterine environment for implantation. Although knowledge of the molecular pathways that act downstream of P4 in implantation is limited, one gene that is both P4 responsive and required for the establishment of an appropriate envi-

ronment for embryo implantation in the mouse uterus is *Hoxa-10*, a member of the *AbdB* subclass of *Hox* genes (4–6). Although *Hox* genes are well known as regulators of patterning in both vertebrate and invertebrate embryonic development, *Hoxa-10*-deficient adult female mice exhibit a severe failure of implantation and defective decidualization that lead to recurrent pregnancy loss and infertility (6).

The uterus is comprised of three major cellular compartments: epithelium, stroma, and myometrium, which are under differential hormonal regulation by ovarian estrogens and P4 (2, 3). In murine reproductive physiology, the major preovulatory ovarian estrogen, estradiol (E2), stimulates the uterine epithelium on d 0.5 to 1.5 post coitum (p.c.), whereas P4 stimulation of the uterine stroma is first evident by d 2.5 p.c. On d 3.5 p.c., estrogen levels rise again so that the uterine stroma has been sequentially primed by estrogen and P4 and is now regulated by both hormones simultaneously (2).

*Hoxa-10* is up-regulated by P4 in the uterine stroma at d 3.5 p.c., 24 h before implantation, and its expression persists in the developing decidua (5, 7). Moreover, previous studies have shown that *Hoxa-10* is required for P4 responsiveness in the uterine stroma (8). For example, in a model in which *Hoxa-10* mutant females are ovariectomized to eliminate variability in hormonal cycling between animals, and then treated with estrogen and P4, stromal cell proliferation is impaired, whereas epithelial cell proliferation is unaf-

Abbreviations: BrdU, Bromodeoxyuridine; cdk, cyclin-dependent kinase; CKI, cyclin-dependent kinase inhibitor; DRG, differentially regulated gene; E2, estradiol; EST, expressed sequence tag; FACS, fluorescence-activated cell sorting; FITC, fluorescein isothiocyanate; P4, progesterone; p.c., post coital; PR, progesterone receptor; PRKO, PR knockout; RT, room temperature; SAM, statistical analysis of microarrays; SOM, self-organizing map; USCs, uterine stromal cells.

ected. In this assay, exogenous P4 and estrogen greatly amplify the magnitude of the basal uterine stromal proliferation defect in ovariectomized *Hoxa-10* mutants relative to wild type (8).

*Hox* genes have been proposed to act as local regulators of cell proliferation during development (9, 10), but molecular effectors for their proposed cell cycle-regulatory function have not been identified. Based on the observed proliferation defect in the *Hoxa-10* mutant stroma, we reasoned that P4 administration to ovariectomized wild-type and *Hoxa-10*-deficient females should amplify differences in gene expression that underlie the *Hoxa-10* mutant stromal proliferation defect. We therefore employed global gene expression profiling to identify *Hoxa-10* downstream genes that mediate the stimulatory effect of P4 on cell cycle progression in the uterine stroma. At the same time, we sought to gain insight into other P4-dependent downstream events that contribute to the defective implantation phenotype in *Hoxa-10* mutant females.

Although implantation depends upon the precisely coordinated effects of estrogen and P4, to study the effects of one steroid hormone at a time, we initially chose to focus only on the gene expression changes produced by P4. However, to establish physiological relevance of findings derived from an ovariectomy model to normal implantation, we then further evaluated the results in a combined E2 + P4 context, d 3.5 p.c. of natural pregnancy.

## RESULTS

### Experimental Design: General Considerations

To identify genes that are differentially expressed between wild-type and *Hoxa-10* mutants, RNA was collected from uteri of ovariectomized female mice 6 h after P4 injection (Fig. 1A). In the ovariectomy model, denoted OVX/P4/6 h, in which ovarian production of endogenous P4 and E2 is absent, P4 injection permits the study of differential gene expression specific to the mediation of the P4 response by *Hoxa-10*. To extend the previous finding that *Hoxa-10* mRNA expression is significantly up-regulated in the uterine stroma 6 h after P4 injection (6), we performed Western blot analyses for *Hoxa-10* protein expression at 0, 1, 3, 6, 9, 12, 18, and 24 h after P4 injection. *Hoxa-10* protein was up-regulated in response to P4 and reached its peak expression 6 h after injection (Fig. 1B). *Hoxa-10* protein levels are stable at the later time points, declining by 24 h (data not shown). The 6-h time point was therefore chosen to optimize the identification of immediate or near-immediate targets of *Hoxa-10*. Compared with the physiological periimplantation uterus, the proportion of stroma to epithelium is greater in the OVX/P4/6 h model. Thus, the strategy chosen was designed to maximize the yield of *Hoxa-10* downstream genes in the uterine stroma.

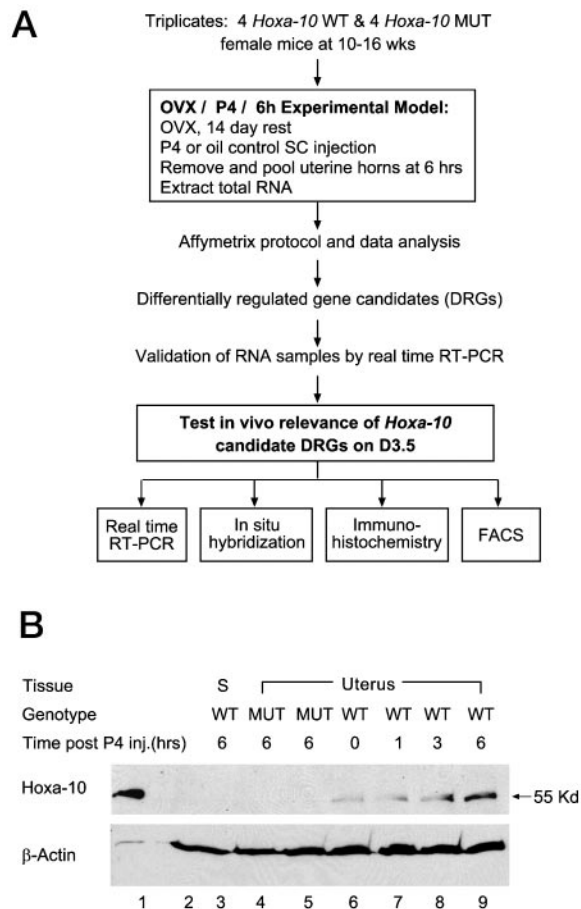

**Fig. 1.** Experimental Strategy

A, Protocol for gene expression profiling and experimental evaluation of DRGs in the *Hoxa-10* mutant uterus. B, Total uterine protein extracts collected at 0, 1, 3, and 6 h after P4 injection in ovariectomized wild-type mice show significant up-regulation of *Hoxa-10* protein (~55 kDa) by 6 h. Subsequent levels were constant, declining by 24 h (not shown). Lane 1, Positive control (10  $\mu$ g of protein extract from U2OS cells transfected with *Hoxa-10* expression plasmid driven by cytomegalovirus promoter); lane 2, no sample loaded; lanes 3–9 were each loaded with 25  $\mu$ g of protein extract except for lane 5 (40  $\mu$ g). WT, Wild type; MUT, *Hoxa-10* mutant; S, spleen.

Because we sought to study the function of *Hoxa-10* in the preimplantation uterus, we then further tested the *in vivo* relevance of select candidate downstream genes derived from the OVX/P4/6 h model in the context of normal pregnancy. This was done in d 3.5 p.c. pregnant mice by using quantitative real time RT-PCR, *in situ* hybridization, flow cytometry, and bromodeoxyuridine (BrdU) incorporation experiments (Fig. 1A). We chose d 3.5 p.c. as it represents an early physiological time point in the response of the uterus to P4 and coincides with the onset of *Hoxa-10* expression in the uterine stroma. Furthermore, it precedes the earliest observable implantation defect, the failure of embryo attachment to the uterus, which normally occurs late on d 3 p.c. Therefore, to a first approximation,

differential gene expression occurring at d 3.5 p.c. is less likely to reflect a failure of implantation and more likely to reflect changes in gene expression that contribute to the implantation defect in the *Hoxa-10* mutant.

### Gene Expression Profiling Detects Differentially Regulated Genes (DRGs) in the *Hoxa-10* Mutant Uterine Stroma

Gene expression profiles of more than 12,000 genes (6,000 known genes and 6,000 expressed sequence tags) represented on the U74Av.2 oligonucleotide array (Affymetrix, Santa Clara, CA) were first analyzed by dChip (11, 12). All subsequent analyses were performed on dChip model-based expression indices. The fold difference cutoff in all analyses was 1.5-fold unless otherwise specified. Independent analyses using Statistical Analysis of Microarrays (SAM) and conventional *t* test (13, 14) yielded 92 and 81 genes, respectively, that were differentially expressed between wild-type and *Hoxa-10* mutant uteri in the OVX/6 h/P4 model (Table 1). A total of 57 genes were identified by both SAM and *t* test. The high degree of overlap (>50%) between these two analytical methods, which are based on very different statistical assumptions, points to the robustness of the data analysis. Combining the gene lists obtained by SAM and *t* test yielded a total of 116 differentially regulated genes, or DRGs, and all subsequent data analyses and experiments were based on these 116 DRGs (Table 1).

Of the 116 DRGs, 26 genes were more highly expressed in the wild-type uterus, whereas 90 genes were more highly expressed in the *Hoxa-10* mutant uterus [Tables 2 and 3, Refs. 15 and 16, and see the supplemental data for complete list of data and their corresponding GEO accession numbers (Ref. 12 and published on The Endocrine Society's Journals Online web site, <http://mend.endojournals.org>)]. The preponderance of up-regulated DRGs in the *Hoxa-10* mutant uterus in response to P4 was robust and pertained regardless of the threshold fold difference. This result suggests that the predominant downstream effect of *Hoxa-10* in this tissue is repressive, or that *Hoxa-10* up-regulates transcriptional repressors. None of the DRGs were significantly differentially regulated in control experiments in which oil vehicle rather than P4 was

injected (data not shown; Refs. 15 and 17). The functional categories represented by the DRGs and the number of DRGs in each category are listed in Table 4. The five predominant functional categories of DRGs relate to: 1) immune, complement, and chemokine functions; 2) enzyme function or metabolism; 3) adipocyte function, fat metabolism, and energy balance; 4) transcriptional regulation; and 5) cell cycle control and cell proliferation. A panel of eight DRGs representing different functional categories was quantitatively validated by real-time RT-PCR. Consistent with the microarray data, *Hoxa-11*, *Follistatin*, and *Slap* were more highly expressed in wild type relative to *Hoxa-10* mutant uterus, whereas *Adipsin*, *Inhibitor of DNA binding-1*, *Lactotransferrin*, *Gas6*, and *p57* were more highly expressed in the *Hoxa-10* mutant (12). In addition, the stromal expression of 14 DRGs, including five of the above-mentioned genes, was either demonstrated by *in situ* hybridization experiments or ascertained from the literature (12). Thus, the experimental strategy was successful in enriching for stromally expressed *Hoxa-10*-dependent DRGs in the preimplantation uterus.

### *Hoxa-11* Is Coregulated by *Hoxa-10* and P4

As *Hoxa-11* is known to be up-regulated by P4 (7), we independently analyzed all RNA samples by real-time RT-PCR analysis for *Hoxa-11* expression to determine whether its expression is altered in the *Hoxa-10* mutant uterus. Compared with wild-type mice injected with oil, mice injected with P4 showed significantly higher *Hoxa-11* expression levels at each time point analyzed, with peak expression occurring at 6 h (Fig. 2A). Notably, however, the induction of *Hoxa-11* expression was markedly attenuated in *Hoxa-10* mutant uteri compared with wild type. In four independent real-time RT-PCR experiments, each conducted in triplicate and consisting of pooled uterine RNA from four wild-type and four mutant mice, the mean normalized *Hoxa-11* expression level was  $2.5 \pm 0.2$  (mean  $\pm$  SEM) in wild type, compared with  $1.5 \pm 0.1$  in *Hoxa-10* mutants (Fig. 2B). This attenuation in *Hoxa-11* expression in the *Hoxa-10* mutant 6 h after P4 injection was highly significant ( $P = 0.01$ ; two-tailed *t* test). Therefore, as suggested by the microarray analysis (Table 2) and confirmed by real-time RT-PCR, the

**Table 1.** Summary of DRG Identification by SAM and *t* Test

|                                | No. of Genes Identified by |               |                            |                      |
|--------------------------------|----------------------------|---------------|----------------------------|----------------------|
|                                | SAM                        | <i>t</i> Test | Both SAM and <i>t</i> Test | SAM or <i>t</i> Test |
| Higher expression in wild type | 15                         | 23            | 12                         | 26                   |
| Higher expression in mutant    | 77                         | 58            | 45                         | 90                   |
| Total no. DRGs <sup>a</sup>    | 92                         | 81            | 57                         | 116                  |

<sup>a</sup> The total number of 116 DRGs was represented by 119 probe sets because in three cases, two probe sets represented the same DRG.

**Table 2.** Genes that Have Significantly Higher Uterine Expression Levels in the Wild Type Compared with *Hoxa-10* Mutant at 6 h after P4 Injection in Ovariectomized Mice (15, 16)

| Probe Set ID | Gene Name                                                                        | Statistical Tests  |                      |
|--------------|----------------------------------------------------------------------------------|--------------------|----------------------|
|              |                                                                                  | Fold Change by SAM | Paired <i>t</i> Test |
| 98817_at     | Follistatin                                                                      | <sup>a</sup> 4.91  | <sup>a</sup>         |
| 92970_at     | Homeobox A10                                                                     | <sup>a</sup> 3.49  | <sup>a</sup>         |
| 99926_at     | Polymeric Ig receptor                                                            | <sup>a</sup> 2.68  |                      |
| 98577_f_at   | Endogenous retroviral sequence 4 (with leucine tRNA primer)                      | <sup>a</sup> 2.54  | <sup>a</sup>         |
| 93860_i_at   | Mouse endogenous murine leukemia virus modified polytropic provirus <sup>b</sup> | <sup>a</sup> 2.48  | <sup>a</sup>         |
| 93861_f_at   | Mouse endogenous murine leukemia virus modified polytropic provirus <sup>b</sup> | <sup>a</sup> 2.22  | <sup>a</sup>         |
| 100381_at    | Actin, $\alpha$ 1, skeletal muscle                                               | <sup>a</sup> 2.11  | <sup>a</sup>         |
| 92796_at     | Alkaline phosphatase 2, liver                                                    | <sup>a</sup> 2.04  | <sup>a</sup>         |
| 92852_at     | Fibronectin 1                                                                    | 1.82               | <sup>a</sup>         |
| 99637_at     | Procollagen, type XV                                                             | 1.81               | <sup>a</sup>         |
| 101900_at    | Cdk inhibitor 2B (p15, inhibits Cdk4)                                            | <sup>a</sup> 1.75  | <sup>a</sup>         |
| 161670_f_at  | EST <i>Mus musculus</i> cDNA, GB no. AV140884                                    | <sup>a</sup> 1.73  | <sup>a</sup>         |
| 100064_f_at  | Gap junction membrane channel protein $\alpha$ 1                                 | <sup>a</sup> 1.72  | <sup>a</sup>         |
| 96602_g_at   | EST <i>M. musculus</i> cDNA, 3 end/clone = UI-M-BH1-akt-a-08-0-UI                | 1.70               | <sup>a</sup>         |
| 161595_at    | EST <i>M. musculus</i> cDNA, GB No. AV292586                                     | <sup>a</sup> 1.66  | <sup>a</sup>         |
| 104480_at    | Cathepsin L                                                                      | 1.65               | <sup>a</sup>         |
| 93873_s_at   | Homeobox A11, opposite strand transcript                                         | <sup>a</sup> 1.63  | <sup>a</sup>         |
| 102259_at    | 3-Monooxygenase/tryptophan 5-monooxygenase activation protein, $\gamma$          | <sup>a</sup> 1.63  |                      |
| 103049_at    | <i>M. musculus</i> N-myc gene, 3 end; MoMuLV-like endogenous provirus            | 1.63               | <sup>a</sup>         |
| 101294_g_at  | Glucose-6-phosphate dehydrogenase 2                                              | 1.62               | <sup>a</sup>         |
| 104021_at    | Homeobox A11                                                                     | <sup>a</sup> 1.61  | <sup>a</sup>         |
| 160899_at    | Purkinje cell protein 4                                                          | 1.59               | <sup>a</sup>         |
| 101707_at    | Alcohol dehydrogenase family 1, subfamily A7                                     | 1.56               | <sup>a</sup>         |
| 160376_at    | EST <i>M. musculus</i> cDNA, clone = UI-M-BH2.2-aqm-e-10-0-UI                    | 1.56               | <sup>a</sup>         |
| 95246_at     | EST <i>M. musculus</i> cDNA, GB no. AA516958                                     | <sup>a</sup> 1.51  |                      |
| 102637_at    | TGF $\beta$ receptor III                                                         | 1.48               | <sup>a</sup>         |
| 160923_at    | EST <i>M. musculus</i> cDNA, clone = IMAGE-1478803                               | 1.45               | <sup>a</sup>         |

These genes have significantly different uterine expression levels in *Hoxa-10* wild type compared to mutant in the OVX/6h/P4 model by paired analysis in SAM, conventional *t* test, or both. EST, Expressed sequence tag.

<sup>a</sup> Statistical significance based on the following criteria: *t* test, fold change of at least 1.5,  $P \leq 0.1$ , an absolute difference in expression of at least 75 units; SAM, fold change of at least 1.5 in paired testing and median false detection rate of 10%.

<sup>b</sup> Two probe sets representing the same gene were identified.

uterine stromal expression of *Hoxa-11* is positively regulated, directly or indirectly, by *Hoxa-10* as well as by P4.

#### Identification of Additional Genes that Are Coregulated by *Hoxa-10* and P4

We next tested the DRGs for further evidence of coregulation by using a time series model, in which uteri were collected from ovariectomized wild-type mice at 0, 1, 3, 6, 9, 12, 15, 18, and 24 h after P4 injection (15, 18, 18a). In contrast to the OVX/P4/6 h model in which genotype (wild type vs. mutant) was the variable, in the time series model, genotype was constant (wild type only), whereas the time after P4 injection exposure varied. A self-organizing map (SOM) algorithm (19) was used to cluster genes that showed sufficient variation in expression during the time series. The criteria for sufficient variation were: 1) the minimum fold change in expression level between at least two time points is greater than 2; and 2) the minimum difference in expression level between at least two time points is

greater than 75 U; 1675 genes fulfilled the inclusion criteria and were grouped into 18 clusters. The SOM algorithm arranged the clusters as nodes in a  $3 \times 6$  grid configuration, with the physical distance between two clusters on the grid reflecting the degree of similarity of their expression profiles. As a result, adjacent clusters are more similar than nonadjacent clusters. The  $3 \times 6$  arrangement of these 18 SOM clusters and their respective gene lists can be viewed in the supplemental data (Ref. 12 and published on The Endocrine Society's Journals Online web site, <http://mend.endojournals.org>).

Four such clusters are shown in Fig. 3. Cluster 3 demonstrates the consistency of the data and the power of this analytical method in clustering coregulated genes. Of the genes in cluster 3, 78% (40/51) consisted of *Ig* genes, which are B lymphocyte specific (Fig. 3A). Interestingly, there was no apparent difference in the regulation of these *Ig* genes between wild type and mutant. Nonetheless, the striking coordinate down-regulation of *Ig* genes in response to P4 indicates that major changes in the dynamics of intra-

**Table 3.** Genes that Have Significantly Higher Uterine Expression Levels in the *Hoxa-10* Mutant Compared with Wild Type at 6 h after P4 Injection in Ovariectomized Mice (15, 16)

| Probe Set ID | Gene Name                                                                    | Statistical Test   |               |
|--------------|------------------------------------------------------------------------------|--------------------|---------------|
|              |                                                                              | Fold Change by SAM | Paired t Test |
| 160375_at    | EST <i>M. musculus</i> cDNA, GB no. AJ006474                                 | <sup>a</sup> 3.09  | <i>a</i>      |
| 103238_at    | Wingless-related MMTV integration site 4                                     | <sup>a</sup> 3.00  | <i>a</i>      |
| 94057_g_at   | Cluster Incl M21285:Stearoyl-coenzyme A desaturase 1 <sup>b</sup>            | <sup>a</sup> 2.67  | <i>a</i>      |
| 99671_at     | Adipsin                                                                      | <sup>a</sup> 2.61  | <i>a</i>      |
| 101115_at    | Lactotransferrin                                                             | <sup>a</sup> 2.46  | <i>a</i>      |
| 99104_at     | Adipocyte complement related protein of 30 kDa                               | <sup>a</sup> 2.42  | <i>a</i>      |
| 102798_at    | Adrenomedullin                                                               | <sup>a</sup> 2.41  | <i>a</i>      |
| 94056_at     | Cluster Incl M21285:Stearoyl-coenzyme A desaturase 1 <sup>b</sup>            | <sup>a</sup> 2.38  | <i>a</i>      |
| 160852_at    | Keratin complex 1, acidic, gene 15                                           | <sup>a</sup> 2.37  | <i>a</i>      |
| 97402_at     | Thioether S-methyltransferase                                                | <sup>a</sup> 2.08  | <i>a</i>      |
| 102823_at    | Ig heavy chain 3 (serum IgG2b) <sup>p</sup>                                  | <sup>a</sup> 2.08  |               |
| 93996_at     | Cytochrome P450, 2e1, ethanol inducible                                      | <sup>a</sup> 2.07  | <i>a</i>      |
| 161354_f_at  | EST <i>M. musculus</i> cDNA, GB no. AV161034                                 | <sup>a</sup> 2.00  | <i>a</i>      |
| 99369_f_at   | Ig kappa light chain variable region precursor (Vk10c) gene                  | <sup>a</sup> 1.97  |               |
| 103538_at    | DNA segment, Chr 5, ERATO Doi 189, expressed                                 | <sup>a</sup> 1.92  | <i>a</i>      |
| 92805_s_at   | ADP-ribosylation-like 4                                                      | <sup>a</sup> 1.86  |               |
| 102824_g_at  | Ig heavy chain 3 (serum IgG2b) <sup>p</sup>                                  | <sup>a</sup> 1.86  |               |
| 160173_at    | EST <i>M. musculus</i> cDNA, GB no. AI852838                                 | <sup>a</sup> 1.86  |               |
| 93855_at     | Rad and gem related GTP-binding protein                                      | <sup>a</sup> 1.82  | <i>a</i>      |
| 100334_f_at  | Kallikrein 13                                                                | <sup>a</sup> 1.81  | <i>a</i>      |
| 93515_at     | Cadherin 16                                                                  | <sup>a</sup> 1.78  |               |
| 96088_at     | N-myc downstream regulated 2                                                 | <sup>a</sup> 1.78  | <i>a</i>      |
| 101947_at    | Neighbor of A-kinase-anchoring protein 95                                    | <sup>a</sup> 1.72  | <i>a</i>      |
| 102725_at    | Potassium voltage-gated channel, shaker-related subfamily, $\beta$ -member 1 | <sup>a</sup> 1.72  |               |
| 104469_at    | Glycoprotein 38                                                              | <sup>a</sup> 1.72  | <i>a</i>      |
| 93198_at     | Colony-stimulating factor 3 receptor (granulocyte)                           | <sup>a</sup> 1.67  |               |
| 98792_at     | EST <i>M. musculus</i> cDNA, GB no. W51672                                   | <sup>a</sup> 1.67  | <i>a</i>      |
| 93486_at     | Solute carrier family 27 (fatty acid transporter), member 1                  | <sup>a</sup> 1.66  |               |
| 104242_f_at  | EST <i>M. musculus</i> cDNA, GB no. AI835622                                 | <sup>a</sup> 1.65  |               |
| 96765_at     | Paternally expressed gene 3                                                  | <sup>a</sup> 1.65  |               |
| 98453_at     | FMS-like tyrosine kinase 1                                                   | <sup>a</sup> 1.64  |               |
| 101578_f_at  | Actin, $\beta$ , cytoplasmic                                                 | <sup>a</sup> 1.64  |               |
| 95356_at     | Apolipoprotein E                                                             | <sup>a</sup> 1.63  | <i>a</i>      |
| 103819_at    | Src homology 2 domain-containing transforming protein D                      | <sup>a</sup> 1.63  |               |
| 97950_at     | Xanthine dehydrogenase                                                       | <sup>a</sup> 1.62  | <i>a</i>      |
| 100050_at    | Inhibitor of DNA binding 1                                                   | <sup>a</sup> 1.61  | <i>a</i>      |
| 100998_at    | Histocompatibility 2, class II antigen A, $\beta$ 1                          | <sup>a</sup> 1.61  | <i>a</i>      |
| 95471_at     | cdk inhibitor 1C (P57)                                                       | <sup>a</sup> 1.60  | <i>a</i>      |
| 95759_at     | Stearoyl-coenzyme A desaturase 2                                             | <sup>a</sup> 1.60  | <i>a</i>      |
| 93615_at     | Pre-B-cell leukemia transcription factor 3                                   | <sup>a</sup> 1.60  |               |
| 96825_at     | EST <i>M. musculus</i> cDNA, GB no. AI854794                                 | <sup>a</sup> 1.60  | <i>a</i>      |
| 99481_at     | ATPase, Na <sup>+</sup> /K <sup>+</sup> transporting, $\alpha$ 2 polypeptide | <sup>a</sup> 1.60  |               |
| 101969_at    | Neuroblastoma, suppression of tumorigenicity 1                               | <sup>a</sup> 1.60  | <i>a</i>      |
| 98960_s_at   | UDP-Gal:betaGlcNAc $\beta$ 1,3-galactosyltransferase, polypeptide 3          | <sup>a</sup> 1.59  | <i>a</i>      |
| 100069_at    | Cytochrome P450, 2f2                                                         | <sup>a</sup> 1.59  | <i>a</i>      |
| 99187_f_at   | EST <i>M. musculus</i> cDNA, GB no. AI835662                                 | <sup>a</sup> 1.59  | <i>a</i>      |
| 103954_at    | Rat generating islet-derived, mouse homolog 3 $\alpha$                       | <sup>a</sup> 1.59  | <i>a</i>      |
| 160373_i_at  | EST <i>M. musculus</i> cDNA, GB no. AI839175                                 | <sup>a</sup> 1.59  | <i>a</i>      |
| 95082_at     | IGF binding protein 3                                                        | <sup>a</sup> 1.58  | <i>a</i>      |
| 96907_at     | DNA segment, Chr 8, Wayne State University 96, expressed                     | <sup>a</sup> 1.58  |               |
| 161610_at    | N-myc downstream regulated 2                                                 | <sup>a</sup> 1.57  | <i>a</i>      |
| 102157_f_at  | Ig V- $\kappa$ 10-Ars-A kappa chain gene, complete cds                       | <sup>a</sup> 1.57  |               |
| 102371_at    | Nuclear receptor subfamily 4, group A, member 1                              | <sup>a</sup> 1.57  | <i>a</i>      |
| 92836_at     | EST <i>M. musculus</i> cDNA, 5 end/clone = IMAGE-1316437                     | 1.56               | <i>a</i>      |
| 93015_at     | Glutathione S-transferase, $\alpha$ 3                                        | <sup>a</sup> 1.56  |               |
| 99828_at     | EST <i>M. musculus</i> cDNA, GB no. AA673252                                 | <sup>a</sup> 1.56  |               |

Table 3. Continued

| Probe Set ID | Gene Name                                                      | Statistical Test   |                      |
|--------------|----------------------------------------------------------------|--------------------|----------------------|
|              |                                                                | Fold Change by SAM | Paired <i>t</i> Test |
| 95019_at     | Glutathione-S-transferase, $\theta$ 1                          | <sup>a</sup> 1.56  | <sup>a</sup>         |
| 101082_at    | Malic enzyme, supernatant                                      | <sup>a</sup> 1.55  |                      |
| 100153_at    | Neural cell adhesion molecule                                  | <sup>a</sup> 1.55  |                      |
| 160905_s_at  | Hypothetical protein MNCb-2875                                 | <sup>a</sup> 1.55  |                      |
| 97548_at     | FK506-binding protein 3 (25kD)                                 | <sup>a</sup> 1.55  |                      |
| 96592_at     | Phosphatidylinositol 3-kinase, p85 $\alpha$ regulatory subunit | <sup>a</sup> 1.53  | <sup>a</sup>         |
| 98790_s_at   | Myeloid ecotropic viral integration site 1                     | <sup>a</sup> 1.53  | <sup>a</sup>         |
| 100431_at    | Leptin receptor                                                | <sup>a</sup> 1.53  | <sup>a</sup>         |
| 161310_at    | EST <i>M. musculus</i> cDNA, GB no. AV079187                   | <sup>a</sup> 1.53  |                      |
| 92245_at     | EST <i>M. musculus</i> cDNA, GB no. AI642262                   | <sup>a</sup> 1.52  |                      |
| 96038_at     | Ribonuclease, RNase A family 4                                 | <sup>a</sup> 1.52  | <sup>a</sup>         |
| 97835_at     | EST AI303516                                                   | <sup>a</sup> 1.52  | <sup>a</sup>         |
| 101593_at    | Nudix (nucleotide diphosphate linked moiety X)-type motif 3    | <sup>a</sup> 1.52  | <sup>a</sup>         |
| 98868_at     | Cluster Incl L31532:B-cell leukemia/lymphoma 2                 | <sup>a</sup> 1.51  |                      |
| 99067_at     | Growth arrest specific 6                                       | <sup>a</sup> 1.51  | <sup>a</sup>         |
| 102744_at    | T cell receptor $\gamma$ , variable 4                          | <sup>a</sup> 1.51  |                      |
| 160306_at    | Thyroid hormone responsive SPOT14 homolog (Rattus)             | <sup>a</sup> 1.51  |                      |
| 160841_at    | D site albumin promoter binding protein                        | <sup>a</sup> 1.51  |                      |
| 97317_at     | Ectonucleotide pyrophosphatase/phosphodiesterase 2             | <sup>a</sup> 1.50  | <sup>a</sup>         |
| 104000_at    | EST <i>M. musculus</i> cDNA, GB no. AI181346                   | <sup>a</sup> 1.50  | <sup>a</sup>         |
| 104285_at    | 3-Hydroxy-3-methylglutaryl-Coenzyme A reductase                | <sup>a</sup> 1.50  |                      |
| 104601_at    | Thrombomodulin                                                 | <sup>a</sup> 1.50  |                      |
| 92366_at     | Laminin, $\alpha$ 2                                            | <sup>a</sup> 1.50  |                      |
| 160564_at    | Lipocalin 2                                                    | <sup>a</sup> 1.49  | <sup>a</sup>         |
| 92534_at     | GTP binding protein (gene overexpressed in skeletal muscle)    | <sup>a</sup> 1.48  | <sup>a</sup>         |
| 99603_g_at   | TGF $\beta$ inducible early growth response                    | 1.48               | <sup>a</sup>         |
| 104516_at    | Claudin 5                                                      | 1.48               | <sup>a</sup>         |
| 104716_at    | Retinol binding protein 1, cellular                            | 1.48               | <sup>a</sup>         |
| 160834_at    | EST <i>M. musculus</i> cDNA, clone = UI-M-AP1-agn-a-04-0-UI    | 1.48               | <sup>a</sup>         |
| 161907_s_at  | Tenascin X                                                     | 1.47               | <sup>a</sup>         |
| 93527_at     | Kruppel-like factor 9                                          | 1.47               | <sup>a</sup>         |
| 104217_at    | EST <i>M. musculus</i> cDNA, clone = UI-M-BH1-akt-a-10-0-UI    | 1.47               | <sup>a</sup>         |
| 93330_at     | Aquaporin 1                                                    | 1.46               | <sup>a</sup>         |
| 95693_at     | Isocitrate dehydrogenase 2 (NADP+), mitochondrial              | 1.46               | <sup>a</sup>         |
| 96148_at     | EST <i>M. musculus</i> cDNA, clone = UI-M-AL1-ahk-f-10-0-UI    | 1.46               | <sup>a</sup>         |
| 104728_at    | Protein S ( $\alpha$ )                                         | 1.44               | <sup>a</sup>         |

<sup>a</sup> Statistical significance based on the following criteria: *t* test, fold change of at least 1.5,  $P \leq 0.1$ , an absolute difference in expression of at least 75 units; SAM, fold change of at least 1.5 in paired testing and median false detection rate of 10%.

<sup>b</sup> Two probe sets representing the same gene were identified.

uterine B cell trafficking, *Ig* gene expression, or both, occur in response to P4.

Of the 18 time series SOM clusters, 3 contain a significantly large number of DRGs, based on calculations using a hypergeometric distribution, followed by Bonferroni correction for multiple tests (Table 5, Fig. 3B, and Refs. 12 and 20). Clusters 1, 5, and 6 are significantly enriched with 12, 7, and 15 DRGs, respectively, ( $P < 0.003$ ; Fig. 3B). The *P* values calculated for the enrichment of each cluster are listed in Table 5. Interestingly, whereas cluster 3 consists predominantly of genes of the *Ig* family, clusters 1, 5, and 6 contain genes with diverse functions. The enrichment of DRGs in clusters derived from the P4 time series model reflects their coregulation by *Hoxa-10* and P4 and further supports the premise that the DRGs identified in the OVX/P4/6 h model are relevant to implantation.

### ***Hoxa-10* Alters Expression of the Cyclin-Dependent Kinase Inhibitor (CKI) Genes *p57(Kip2)* and *p15(Ink4b)***

To further evaluate the *in vivo* relevance of DRGs identified in the OVX/P4/6 h model, we tested specific DRGs for their differential regulation in wild-type and *Hoxa-10* mutant uteri at d 3.5 p.c. of pregnancy. Interestingly, the expression of two CKI genes, *p57(Kip2)* and *p15(Ink4b)* was altered, either quantitatively or qualitatively, in the d 3.5 p.c. *Hoxa-10* mutant uterus. Although *in situ* hybridization revealed that *p57* was diffusely expressed throughout both d 3.5 wild-type and mutant stroma (data not shown), quantitative real-time RT-PCR indicated that *p57* transcripts were increased by  $6.6 \pm 1.8$ -fold (mean  $\pm$  SEM;  $P < 0.08$ ) in

**Table 4.** Functional Categories of DRGs

| DRGs (n) | Functional Category                                                      |
|----------|--------------------------------------------------------------------------|
| 16       | Immune function/complement system/cytokine-related                       |
| 16       | Enzyme/metabolism                                                        |
| 13       | Adipocyte function/fat metabolism/energy balance                         |
| 9        | Transcription regulation/transcription factors                           |
| 8        | Cell cycle/cell proliferation                                            |
| 7        | TGF $\beta$ signaling pathway                                            |
| 6        | Ras-related small GTP-binding proteins/GTPase superfamily                |
| 2        | Cell-cell junction                                                       |
| 4        | Cell adhesion/integrin                                                   |
| 6        | Signaling protein/mesenchymal-epithelial signaling                       |
| 3        | Cytoskeletal/structural                                                  |
| 3        | Ion or water channels/regulation of intracellular osmotic content        |
| 1        | Golgi function/regulation of intracellular transport/vesicular transport |
| 1        | Nuclear/DNA-binding proteins                                             |
| 1        | Iron utilization                                                         |
| 1        | Protease                                                                 |
| 2        | Murine virus                                                             |
| 1        | Novel gene                                                               |
| 1        | Apoptosis inhibitor                                                      |
| 1        | Blood clotting factor                                                    |
| 44       | Unknown genes/ESTs                                                       |

DRGs were classified according to their described functions based on literature search on PubMed. A DRG was placed in more than one category if multiple functions have been described. See supplemental data (Ref. 12 and <http://mend.endojournals.org/>) for complete list of DRGs in each functional category.

the mutant (Fig. 4A), consistent with microarray results of the OVX/P4/6 h model.

On the other hand, although microarray analysis suggested that *p15* expression in the OVX/P4/6 h model was decreased in the mutant, this result was not confirmed by real-time RT-PCR analysis of d 3.5 p.c. uterine RNA. Instead, these analyses showed only a nonsignificant increase in *p15* expression in mutant relative to wild type (Fig. 4A). Nonetheless, to our surprise, *in situ* hybridization showed that the spatial expression pattern of *p15* was clearly altered in the *Hoxa-10* mutant at d 3.5 p.c. (Fig. 4B). In contrast to the restricted wild-type expression of *p15* in the submyometrial stroma and myometrium, in the *Hoxa-10* mutant uterus, *p15* was expressed throughout the entire stroma (Fig. 4B). Similar results were observed in the OVX/P4/6 h model (data not shown). Collectively, these results provide a link between *Hox* gene function and the expression of cell cycle-regulatory genes and provide a potential molecular correlate to the cell proliferation defect previously observed in the *Hoxa-10* ovariectomy model after combined E2 plus P4 treatment (8).

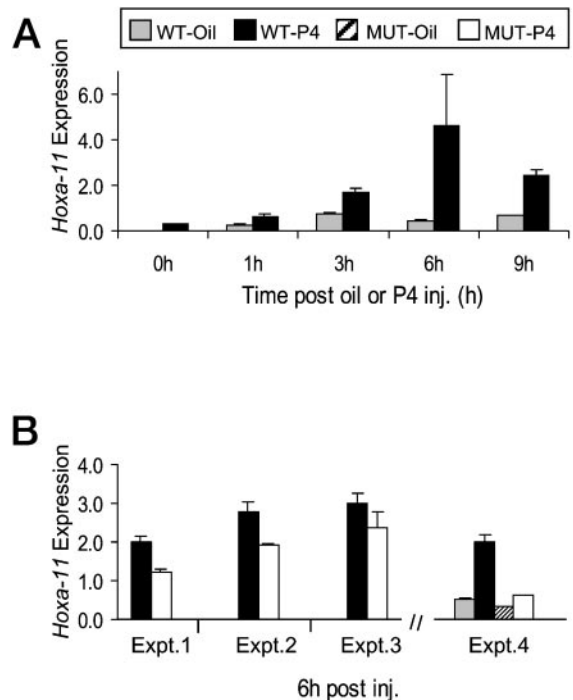

**Fig. 2.** Coregulation of *Hoxa-11* Expression by *Hoxa-10* and P4

A, *Hoxa-11* expression in response to oil and P4 injections in wild-type mice at 0, 1, 3, 6, and 9 h. The differences in *Hoxa-11* expression in P4-injected compared with oil-injected mice are 2.3-, 2.2-, 10.5-, and 3.6-fold, respectively ( $P < 0.05$  for each time point). B, Attenuation of *Hoxa-11* expression levels in the *Hoxa-10* mutant mice at 6 h after P4 injection. In four independent experiments, *Hoxa-11* was more highly expressed in the wild type than *Hoxa-10* mutant by 1.6-, 1.5-, 1.3-, and 3.1-fold, respectively. Overall, wild-type *Hoxa-11* expression was 1.9-fold higher than mutant ( $2.5 \pm 0.2$  vs.  $1.5 \pm 0.1$ ; mean  $\pm$  SEM;  $P = 0.01$ ). In all bar graphs, each bar represents the mean of triplicate measurements of a sample comprised of pooled uterine RNA from four mice of the indicated genotype. Error bars for data points with mean  $\pm$  SEM  $< 0.05$  are not visible. All gene expression levels in Fig. 2 were normalized to *Rpl-7* expression levels. Student's two-tailed *t* test was used to test for statistical significance, and paired *t* test was used when appropriate.

### Uterine Stromal Cell (USC) Proliferation Is Inhibited in *Hoxa-10* Mutants

To test whether stromal cell proliferation was disrupted on d 3.5 p.c. of natural pregnancy in the *Hoxa-10* mutant uterus, we injected d 3.5 p.c. pregnant wild-type and mutant mice with BrdU, and 4 h later, performed immunostaining on freshly isolated USCs with anti-BrdU antibody. The immunostained cells were then analyzed by flow cytometry. In wild-type mice,  $8.9\% \pm 0.1\%$  (mean  $\pm$  SEM) of USCs were BrdU<sup>+</sup>, with 5% background fluorescence in unstained control cells. However, in four replicate experiments in the *Hoxa-10* mutant, only  $5.7 \pm 0.2\%$  of USCs were BrdU<sup>+</sup> (Fig. 4C). The decrease in the proportion of stromal cells that incorporated BrdU

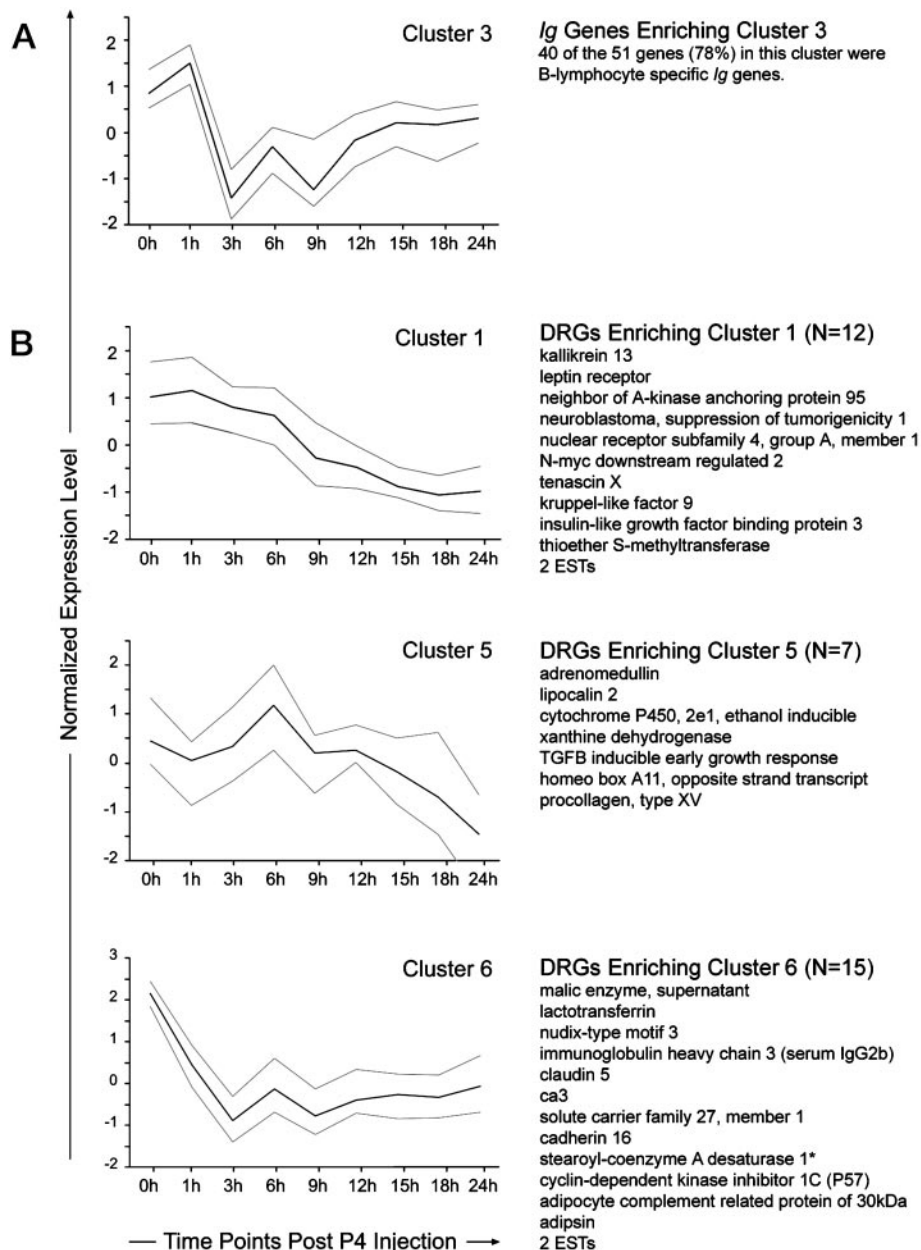

**Fig. 3.** Representative Clusters from SOM Analysis of P4 Time Series

A, SOM cluster 3 from the wild-type time series showed significant enrichment of Ig genes. Forty of the 51 genes (78%) in this cluster were Ig genes expressed by B lymphocytes. The results demonstrate powerful clustering of coregulated genes in the wild-type P4 time series by SOM, independent of DRGs. The *upper*, *middle*, and *lower lines* represent the 90th, 50th, and 10th percentile of the expression level at each time point. B, Wild-type P4 time series SOM clusters with significant enrichment of DRGs. Wild-type P4 time series clusters 1, 5, and 6 had significant enrichment with DRGs (see Table 4). Cluster 6 is especially interesting as it represents genes the repression of which was immediate and then persisted for 24 h. [See web supplement for all SOM clusters of the P4 time series (Ref. 12 and published on The Endocrine Society's Journals Online web site at <http://mend.endojournals.org>).]

in the *Hoxa-10* mutant was significantly lower than in wild type ( $P < 0.01$ ). The decrease in S-phase entry by mutant USCs indicates an important cell cycle-regulatory function of *Hoxa-10* that is compatible with the altered expression of *p57* and *p15* in the *Hoxa-10* mutant peri-implantation uterus.

### Expression Profiling Detects Abnormal Accumulation of T Lymphocytes in the *Hoxa-10* Mutant Uterus

We next investigated the biological relevance of a second group of DRGs that was expressed at higher



**Table 5.** DRG Enrichment of SOM Clusters Identifies Coregulation of Genes by *Hoxa-10* and P4 (15, 18)

| Cluster | DRG Probe Sets (n) | Probe Sets in Cluster (n) | P Value               |
|---------|--------------------|---------------------------|-----------------------|
| 0       | 7                  | 92                        | 7.03E-02              |
| 1       | 12                 | 88                        | 1.16E-04 <sup>a</sup> |
| 2       | 4                  | 108                       | 6.39E-01              |
| 3       | 1                  | 51                        | 8.79E-01              |
| 4       | 0                  | 23                        | 1.00E+00              |
| 5       | 7                  | 36                        | 3.96E-04 <sup>a</sup> |
| 6       | 15                 | 98                        | 3.09E-06 <sup>a</sup> |
| 7       | 4                  | 82                        | 4.18E-01              |
| 8       | 5                  | 58                        | 7.85E-02              |
| 9       | 2                  | 91                        | 8.90E-01              |
| 10      | 0                  | 77                        | 1.00E+00              |
| 11      | 2                  | 115                       | 9.53E-01              |
| 12      | 4                  | 83                        | 4.27E-01              |
| 13      | 0                  | 190                       | 1.00E+00              |
| 14      | 1                  | 162                       | 9.99E-01              |
| 15      | 1                  | 36                        | 7.74E-01              |
| 16      | 1                  | 89                        | 9.76E-01              |
| 17      | 1                  | 196                       | 1.00E-01              |

A total of 1675 probe sets had a minimum relative fold difference greater than 2 and a minimum absolute difference of 75 U in expression levels between two time points and were cluster analyzed by SOM using Genecluster (20). For each cluster, *P* values based on a hypergeometric distribution were calculated using the number of probe sets representing DRGs (DRG probe sets) and the total number of probe sets in that cluster (Probe Sets in Cluster). The significant enrichment for DRGs in clusters 1, 5, and 6 (denoted by <sup>a</sup>) supports the coregulation of these DRGs by *Hoxa-10* and P4 (*P* < 0.0030).

levels in the *Hoxa-10* mutant uterus than in wild type: those pertinent to immune function. In particular, genes expressed in T lymphocytes, including *TCR $\gamma$ V4*, *TCR $\delta$ C*, and *MHC class II I-A<sup>b</sup>*, were overexpressed in the *Hoxa-10* mutant uterine expression profile. Although this result could reflect increased expression of these genes on a per cell basis, we first chose to test the hypothesis that T lymphocytes, a distinct cell population in the uterine stroma, were increased in number in the *Hoxa-10* mutant. Indeed, flow cytometry of cells isolated from the uterine stroma of d 2.5 and 3.5 p.c. pregnant mice, with splenocytes as a control, indicated that the proportions of CD4<sup>+</sup> and CD8<sup>+</sup> T cells were significantly increased in the mutant uterine stroma (Fig. 5A). In addition, this expansion of T cells was polyclonal, as evident by increases in TCR $\gamma$  $\delta$ , TCR $\alpha\beta$ , and NK lineages in the *Hoxa-10* mutant uterus on d 3.5 p.c. (Fig. 5, A and B). Consistent with microarray results showing increased expression of *TCR $\gamma$ V4* and *TCR $\delta$ C* in the *Hoxa-10* mutant, the increase in the number of  $\gamma\delta$  T cells in the physiological pregnant state occurred earliest and was the most dramatic (Fig. 5A). Microarray analysis of heterogeneous uterine tissue thus revealed alterations in gene expression that at least partly reflected changes in cell number within specific stromal T cell subpopulations. These analyses thus indicate a significant and previ-

ously unsuspected immunological phenotype in the *Hoxa-10* mutant uterus.

### Hyperproliferation of T Lymphocytes in the *Hoxa-10* Mutant Uterine Stroma

Alterations in lymphocyte proliferation, trafficking, or both could underlie the increased number of T cells present in the *Hoxa-10* mutant uterus. To test the first possibility, we performed BrdU labeling followed by flow cytometry of uterine lymphocyte populations. These analyses showed an increased proliferation of T cells in the mutant uterine stroma. Thus, even though the overall proliferation index of cells present in d 3.5 p.c. mutant uterine stroma was decreased (Fig. 4C), the proportions of double-positive CD4<sup>+</sup>BrdU<sup>+</sup> and TCR $\gamma\delta$ <sup>+</sup>BrdU<sup>+</sup> cells were actually higher in the mutant uteri by  $5.3 \pm 2.5$ - and  $1.8 \pm 0.1$ - (mean  $\pm$  SEM) fold, respectively (data not shown). These results were derived from two separate experiments, each of which comprised pooled d 3.5 p.c. uteri from five mutant and five wild-type mice. One experiment was performed after a syngeneic mating, whereas the second experiment was performed after an allogeneic mating; both experiments gave similar results. The disparity between the proliferation rate of cells in the uterine stroma, analyzed *en masse*, which is depressed in the *Hoxa-10* mutant, and the proliferation rates of specific intrauterine T lymphocyte subpopulations, which are increased in the *Hoxa-10* mutant, highlights the dynamic nature of the uterine environment at the time of implantation.

We performed immunostaining experiments to further confirm the localization of T cells in the uterus. We chose the CD4 marker for these localization experiments as CD4<sup>+</sup> cells were twice as abundant as CD8<sup>+</sup> cells in all flow cytometry experiments, as seen in the representative experiment in Fig. 5B. Immunostaining experiments confirmed that the CD4<sup>+</sup> cell population resided mainly in the stromal compartment in both wild-type and *Hoxa-10* mutant uterus at both d 0.5 p.c. and d 3.5 p.c. (Fig. 5C). On d 0.5 p.c., when estrogen effects predominate, there was no overt difference in CD4<sup>+</sup> abundance between wild-type and *Hoxa-10* mutant uterus. At d 3.5 p.c., however, when P4 levels are high, CD4<sup>+</sup> immunostaining was greater in the mutant stroma than in wild type (Fig. 5C). The d 3.5 CD4<sup>+</sup> immunostaining results are thus consistent with the CD4<sup>+</sup> flow cytometry analyses (Fig. 5A).

## DISCUSSION

### Fidelity of Expression Profiling Applied to Mouse Implantation

We have demonstrated that gene expression profiling can be used to analyze the hormonal control of implantation by employing a gene-targeted mouse model to dissect the preimplantation events down-

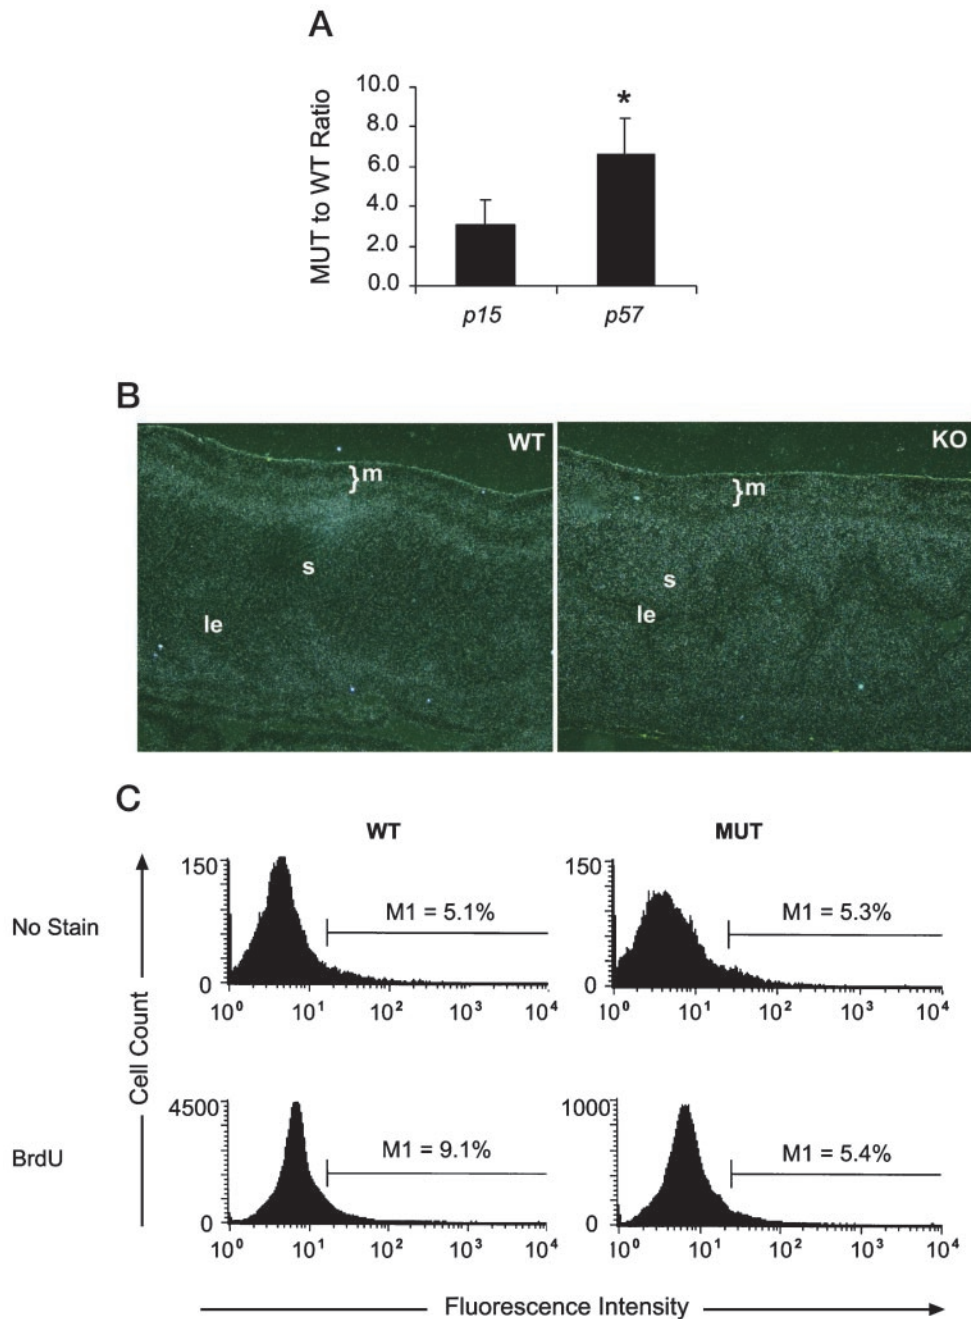

**Fig. 4.** Defective Regulation of CKI Genes and Stromal Cell Proliferation in the *Hoxa-10* Mutant

A, Expression of *p15* and *p57* in the d 3.5 p.c. *Hoxa-10* mutant uterus. Quantitative real time RT-PCR showed higher expression levels of *p57* ( $6.6 \pm 1.8$ -fold) in the mutant compared with wild type on d 3.5 p.c. (\*,  $P = 0.08$  based on paired  $t$  test of log-transformed data). In contrast, although *p15* expression was increased by  $3.1 \pm 1.2$ -fold in the mutant, the increase was not significant. Data represent the mean  $\pm$  SEM of the mutant to wild-type expression ratio from three independent experiments. All expression levels were normalized to 18S. B, *In situ* hybridization showing redistribution of *p15* expression in the *Hoxa-10* mutant uterus. On d 3.5 p.c., *p15* is expressed predominantly in the myometrium (M) and submyometrial stroma (bright stain that is parallel to the myometrial signal) in the wild-type uterus, with low expression in the stroma (S) underlying the luminal epithelium (LE). In contrast, in the *Hoxa-10* mutant, expression is present throughout the entire uterine stroma ( $\times 40$ ). Similar results were observed in three wild-type and three *Hoxa-10* mutant mice, and in the OVX/P4/6 h model. C, Decreased USC proliferation in the d 3.5 p.c. *Hoxa-10* mutant. The proportion of stromal cells that have undergone cell proliferation was significantly less in the mutant ( $5.7 \pm 0.2\%$ ; mean  $\pm$  SEM) than in wild type ( $8.9 \pm 0.1\%$ ) in four replicates;  $P < 0.01$ . Data are analyzed based on M1 approximately 5% BrdU<sup>+</sup> (background) in the no-stain control. Coordinates of M1 are set to be the same in the no-stain and BrdU histograms for each of wild type and mutant. Results shown are representative of four replicates in one experiment. The experiment was performed a total of three times with similar results.

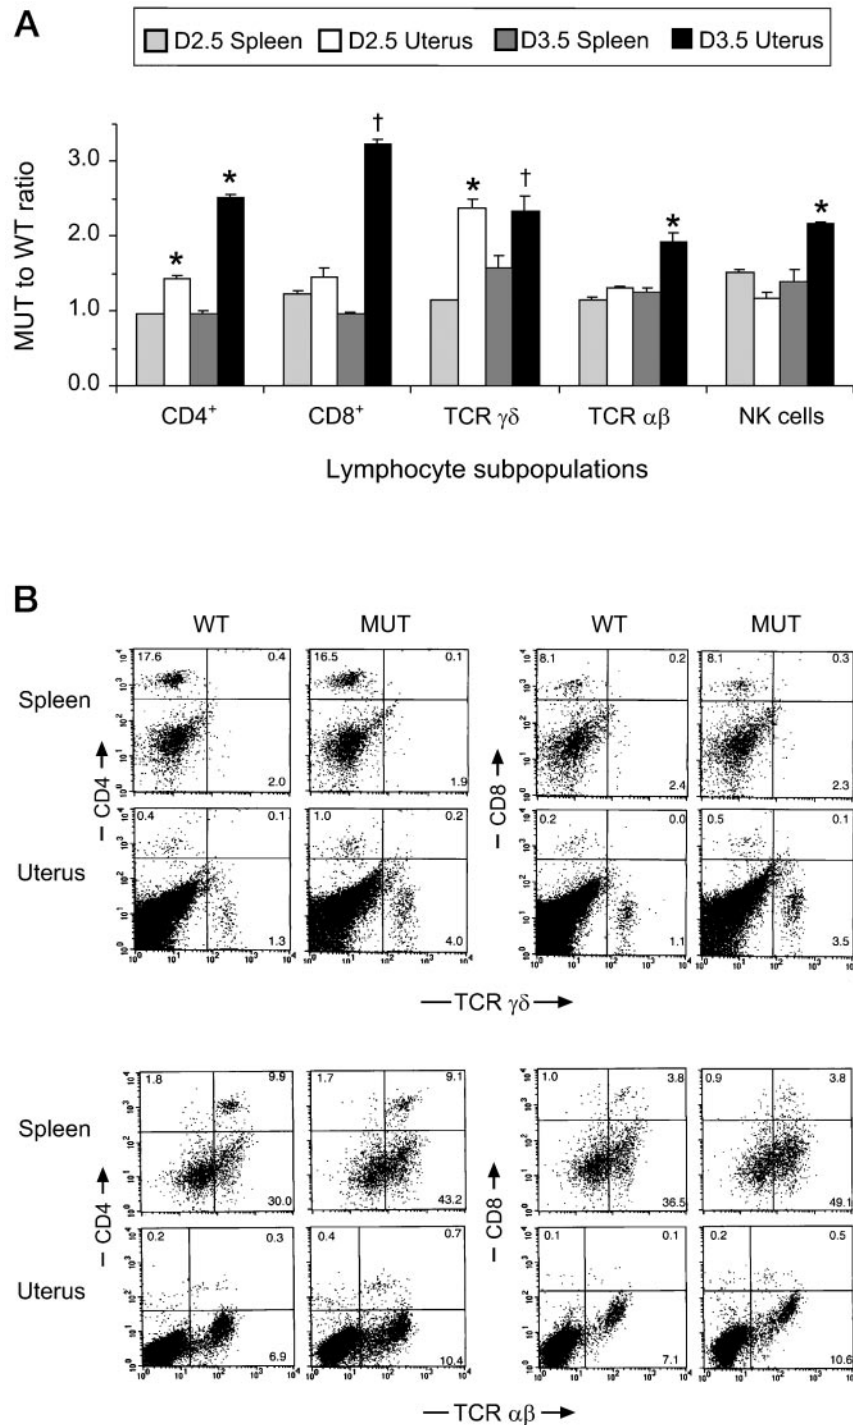

**Fig. 5.** Increase of Relative T Cell Number in the Periimplantation *Hoxa-10* Mutant Uterus

A, The proportion of each lymphocyte subpopulation in the uterine stroma was greater in mutant compared with wild type on d 3.5 p.c. by flow cytometry. On d 2.5 p.c., the proportions of CD4<sup>+</sup> and TCRγδ<sup>+</sup> populations were  $1.4 \pm 0.0$  (mean  $\pm$  SEM) and  $2.4 \pm 0.1$  times greater in the mutant uterus, respectively. On d 3.5 p.c., the CD4<sup>+</sup>, CD8<sup>+</sup>, TCRγδ<sup>+</sup>, TCRαβ<sup>+</sup>, and NK cells (DX5<sup>+</sup>) populations were  $2.5 \pm 0.1$ ,  $3.2 \pm 0.1$ ,  $2.3 \pm 0.2$ ,  $1.9 \pm 0.1$ , and  $2.2 \pm 0.1$  times greater in the mutant uterus compared with wild type, respectively (\*,  $P < 0.01$  and †,  $P < 0.05$  in paired *t* tests comparing the mutant to wild-type ratio for uterus to that of spleen control). Spleen controls showed a mutant to wild-type ratio of approximately 1 for all cell populations. All data analyses for Fig. 5 were performed using a lymphocyte gate set by inclusion of more than 90% of CD3<sup>+</sup> and CD4<sup>+</sup> cells, or by using the lymphocyte gate from spleen samples within the same experiments. B, Increased percentage of single- and double-positive CD4<sup>+</sup> with TCRγδ<sup>+</sup> or TCRαβ<sup>+</sup> cells in d 3.5 p.c. mutant stroma. *Upper panel*, Flow cytometry dot plots showing the TCRγδ<sup>+</sup> vs. CD4<sup>+</sup> T cell markers in USCs isolated from wild type and mutant on d 3.5 p.c. with splenocytes as control. *Lower panel*, Flow cytometry

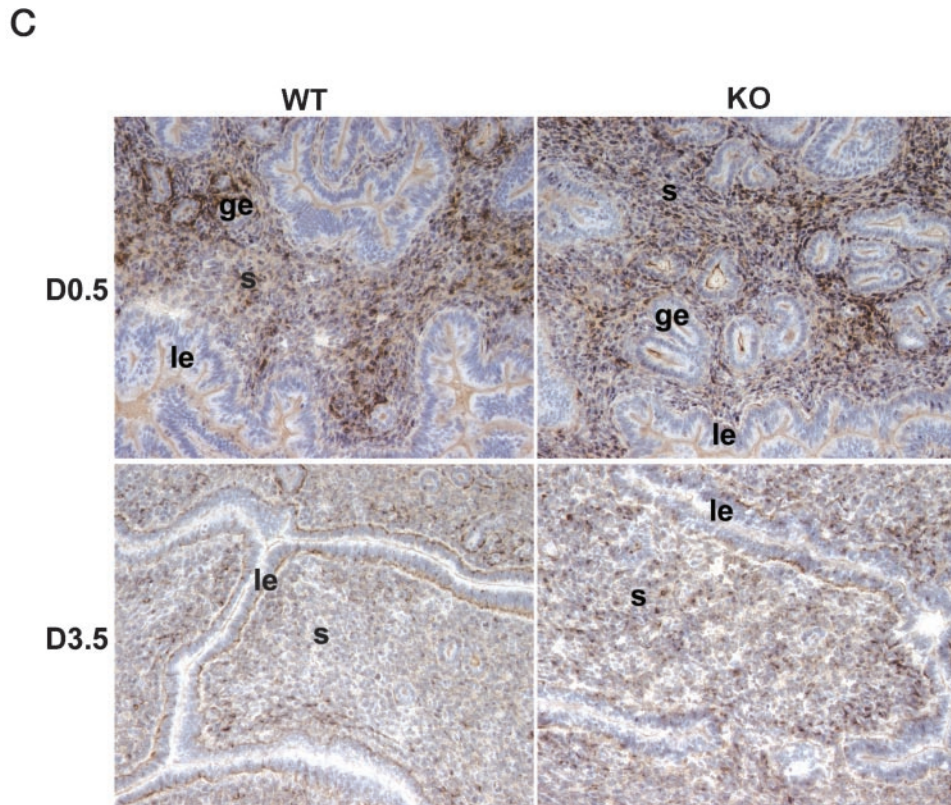

Fig. 5. Continued.

stream of *Hoxa-10*. A key feature of this approach was the experimental design, which proved crucial for identifying the enrichment of *Hoxa-10*-dependent DRGs expressed in the P4-primed uterine stroma. In addition, comparison of experimental data obtained under conditions of varied genotype and duration of P4 exposure permitted the identification of subsets of genes that are likely to be coregulated by *Hoxa-10* and by P4.

An attenuation of P4-induced *Hoxa-11* expression was identified in the *Hoxa-10* mutant uterus by both microarray and real-time RT-PCR. This result was previously not identified by *in situ* hybridization (8), probably because of the inherently nonquantitative nature of this technique. Cross-regulation of *Hox* genes in embryonic patterning is well known (21), as exemplified by the regulation of *Hoxb2* by *Hoxb1* in rhombomere r4 during mouse embryonic development (22). The cross-regulation of *Hoxa-11* by *Hoxa-10* also has important implications in implantation, including the possibility that the progesterone receptor (PR) and

*Hoxa-10* functionally cooperate to mediate the full induction of *Hoxa-11* stromal expression. The relevance of *Hoxa-10* and *Hoxa-11* regulatory interactions to the study of human infertility is further supported by the finding of up-regulated *HOXA-10* and *HOXA-11* expression in the human uterus in response to P4 during the time of implantation (23).

#### Comparison to Other Microarray Studies

The experimental approach described here differs from that in other microarray studies designed to identify genes involved in implantation (24–26). In one study, the same Affymetrix microarray (U74A version 2) used in our analyses was used to identify genes that are differentially expressed between implantation and nonimplantation sites in the wild-type uterus at 23–24 h of d 3 p.c. (26). In our study, we employed unopposed P4 stimulation in wild-type and *Hoxa-10* mutant females to identify *Hoxa-10*-dependent DRGs in the uterine stroma. Under these conditions, *Hoxa-10* ex-

dot plots showing the  $\text{TCR}\alpha\beta^+$  vs.  $\text{CD4}^+$  T cell markers. The number in each quadrant is the percentage of cells in the lymphocyte gate. Dot plots are representative of three experiments for each of d 2.5 p.c. and d 3.5 p.c. tissues. C, Immunostaining showed that  $\text{CD4}^+$  T cell populations (indicated by black staining) in wild type and mutant were predominantly stromal at both d 0.5 and 3.5 p.c. (20 $\times$ ). Sections of wild-type and mutant spleens taken from the same mice were tested in parallel as positive control (not shown). ge, Glandular epithelium; le, luminal epithelium; s, stroma.

pression is strongly induced throughout the uterine stroma (7), a situation that should favor the identification of P4-inducible *Hoxa-10*-dependent stromal target genes. Importantly, however, we also tested the *in vivo* relevance of these DRGs in a physiological pregnancy model at a time point, the morning of d 3 p.c., before implantation and nonimplantation sites are distinguishable. This strategy thus permitted validation of the findings from the OVX/P4/6 h model and should have enriched for *Hoxa-10*-regulated events that precede overt morphological signs of implantation failure in the mutant.

Thus, although our OVX/P4/6 h model cannot be directly compared with the above-mentioned study, data from our OVX/P4/18 h experiments (data not shown), in which uterine RNA was extracted at 18 h after P4 injection, do detect some of the same DRGs reported by Reese *et al.* (26). For example, *BiP*, encoding a calcium-binding Hsp70 class chaperone (reviewed in Ref. 27), is expressed at higher levels in the wild-type than in the *Hoxa-10* mutant uterus. The same gene was also found by Reese *et al.* (26) to be more highly expressed in wild-type implantation sites than interimplantation sites. The expression of genes such as *BiP* may thus mark a later time point in the P4 response than that addressed by the OVX/P4/6 h model.

An especially interesting point of similarity between the present data and that of Reese *et al.* (26) relates to the striking, coordinate regulation of some 40 *Ig* genes in cluster 3 of our SOM analysis. These transcripts are markedly reduced by 3 h after P4 injection, followed by a small peak of expression at 6 h and a slow return to baseline by 24 h. In a composite list of genes showing decreased expression at implantation sites and after initiation of E2-induced implantation, Reese *et al.* identified 21 immune-related genes, of which 14 are classical *Ig* genes (Table III in Ref. 26). Strikingly, 10 of those 14 *Ig* genes are also represented in cluster 3 of our P4 time series experiments, with another three present in the next most closely related cluster, cluster 6. Analysis of sequence similarity among the probe sets representing these genes indicates that their coregulation is unlikely to be explained by cross-hybridization alone (12).

The fact that so many of the same *Ig* genes were identified in both studies, albeit in different contexts, has interesting implications concerning the role of B cells in implantation. As proposed by Medawar (28), a key requirement for establishment of an appropriate uterine implantation environment, in which the implanting blastocyst resembles an allograft, is the induction of a state of immune tolerance. Although much attention has focused on the role of T cells and cellular immunity during implantation (reviewed in Ref. 29), less is known about the regulation of B cell function. Interestingly, although the PR is expressed in B lymphocytes (30), a prior study did not identify major changes in the number of intrauterine B cells after E2 or E2 + P4 in either wild-type or PR knockout (PRKO)

mice (31). Further experiments are required to determine whether P4 mediates local uterine B cell function by regulating *Ig* family gene expression rather than by controlling B cell number.

### **Hoxa-10 Is Required for P4-Mediated Stromal Cell Proliferation and CKI Repression**

The proliferation of stromal cells and their subsequent differentiation into decidual cells are critical events in periimplantation uterine development. In this regard, a key finding was that two CKI genes, *p15* and *p57*, were aberrantly expressed in the *Hoxa-10* mutant uterine stroma. Interestingly, *p57* exhibits similar diffuse stromal expression in both wild type and mutant, but its expression is quantitatively more abundant in the *Hoxa-10* mutant. In contrast, *p15* undergoes a marked shift in its expression from a predominantly myometrial and submyometrial distribution in the wild-type uterus to a diffuse stromal pattern in the *Hoxa-10* mutant.

The altered expression of *p15* and *p57* in the *Hoxa-10* mutant is notable. High expression levels of these CKIs during early G<sub>0</sub>/G<sub>1</sub> can induce cell cycle arrest, as p15 and its family members act as specific inhibitors of the cyclin D-dependent kinases cdk4 and cdk6 (32). p57 family members show similar interactions albeit with a broader range of cyclin-cdk complexes (32). The potential functional roles of *p15* and *p57* are especially relevant as cyclin D3 associates with cdk4 and cdk6, and cyclin D3 is the major G<sub>1</sub>→S cell cycle regulator in the periimplantation uterine stroma (33). Interestingly, in the context of myelomonocytic cell differentiation, *Hoxa-10* directly up-regulates expression of the CKI *p21* and induces differentiation (34). In contrast, in implantation we suggest that it is the quantitative or spatially restricted repression of CKIs such as *p57* and *p15* by *Hoxa-10*, be it direct or indirect, that could explain the stromal cell proliferation defect in *Hoxa-10* mutants. *p57* null mutants die within 10 d of birth and are thus uninformative for the consequences of *p57* loss of function in the uterus; *p15* knockout mice exhibit no uterine phenotype and are even fertile. However, as these results pertain only to loss of function, the functional significance of the increased CKI expression observed in the *Hoxa-10* mutant uterus remains open.

### **The *Hoxa-10* Mutant Uterine Stroma Exhibits Aberrant Lymphoproliferation**

A third key finding in the expression profiling experiments was that of increased transcript levels of various T cell genes. Although the absolute expression of these genes on a per cell basis may be altered, the increased number of T cells in the mutant stroma, as demonstrated by flow cytometry, is in qualitative agreement with the increased levels of T cell-related transcripts in the mutant. Moreover, flow cytometry analyses indicated an increased proliferation rate of these cells.

The lymphoproliferation observed in the *Hoxa-10* mutant uterine stroma is polyclonal and occurred after both syngeneic and allogeneic matings. These observations argue for a defect in T cell signaling and against an antigen-specific immune response as the cause for the immune phenotype. *Hoxa-10* is expressed in early myeloid progenitors but is not known to be present in mature neutrophils, monocytes, or lymphocytes (35, 36). This is consistent with our findings that splenocytes do not express *Hoxa-10* (Fig. 1B). Thus, although it remains to be formally tested whether T cells in the periimplantation uterus express *Hoxa-10*, the available evidence suggests that the aberrant, intrauterine lymphoproliferation in *Hoxa-10* mutants is unlikely to result from a T cell autonomous defect. Interestingly, as exemplified by cluster 6 of the P4 time series, many chemokines, chemokine receptors, and cytokines known to be mitogenic for T cells are down-regulated in the uterine stroma in the presence of P4, and many of these same immunoregulatory genes are incompletely repressed by P4 in the *Hoxa-10* mutant stroma (12). Thus, it is attractive to propose that in the mutant uterus, *Hoxa-10*-deficient stromal cells stimulate the inappropriate proliferation of T cells by paracrine signaling mechanisms.

The distinct immunological phenotype in the *Hoxa-10* mutant uterine stroma may directly cause the implantation defect in *Hoxa-10* mutant females, as the cytolytic and inflammatory activities of T cells are well known to adversely affect the viability of implanting blastocysts. Indeed, the importance of local uterine immunosuppression to normal embryo implantation and pregnancy has been observed in several mouse models. For example, in a CBA/J  $\times$  DBA/2J mouse model that exhibits a high rate of spontaneous abortion mediated by a monoclonal infiltration of  $\gamma\delta$  T cells, treatment with a monoclonal antibody directed against the  $\gamma\delta$  T cell clone restores fertility (29, 37). Implantation defects are also observed in mouse models with altered uterine immunosuppression (38) and aberrant T cell proliferation (39), and these defects are abolished in lymphocyte-deficient mice, which have normal fertility. Lastly, embryonic resorption and maternal leukocyte infiltration are observed at implantation sites in the *Hoxa-10* mutant (6). Thus, the aberrant lymphoproliferation observed in the *Hoxa-10*-deficient pregnant uterus can be viewed as a localized, proinflammatory response that could potentially compromise pregnancy.

It is interesting to compare the abnormal immune state present in the *Hoxa-10*-deficient uterus with the proinflammatory uterus described in PRKO mice (40). Experiments using the PRKO mice demonstrate that P4 acts via its receptor to antagonize the proinflammatory activity of estrogen, thereby decreasing the number of neutrophils and macrophages in the uterus. In contrast, the number of B lymphocytes remains unchanged (31). In the *Hoxa-10* mutant, our data suggest that P4 may act at the time of implantation through *Hoxa-10* to reduce the number of T cells in the

uterus. Alternatively, *Hoxa-10* may act with the PR to coregulate T cell number; moreover, these possibilities are not exclusive.

Although many possible mechanisms may underlie the preponderance of up-regulated DRGs observed in the *Hoxa-10* mutant uterus, repressive functions have been described for both PR (41–43) and Hox proteins (44–46). Thus, it is possible that *Hoxa-10* may act as corepressor and be required for transcriptional regulation by PR. Repressive functions of *Hox* genes have been described in *Drosophila* development (44), and corepressor activity has been described for several mammalian *Hox* genes (45, 46), but mammalian targets of *Hox* gene repression, direct or indirect, have been difficult to ascertain *in vivo*. Based on their differential regulation in the *Hoxa-10* mutant uterus, we have identified several candidate *Hoxa-10* downstream genes, at least one of which, *Hoxa-11*, is also required for implantation (47). In addition, the analysis of specific DRGs in the d 3.5 p.c. pregnant uterus suggests a potential mechanism for how *Hoxa-10* regulates stromal cell proliferation. Lastly, our analyses at d 3.5 also reveal that *Hoxa-10* is required for the proper regulation of intrauterine T cell dynamics. Both of these latter events are critical to implantation.

## MATERIALS AND METHODS

### Mice

Disruption of the *Hoxa-10* gene was performed by insertion of a neomycin resistance cassette into an *Xho*I site within the homeobox by homologous recombination in 129/SvJ embryonic stem cells and generation of chimeric mice (5). No differences in female infertility were observed among 129/SvJ, mixed BALB/c  $\times$  129/SvJ and mixed C57BL/6  $\times$  129/SvJ backgrounds (6). For natural matings, virginal females between 10–16 wk of age were mated with *Hoxa-10*<sup>+/-</sup> 129/SvJ stud males unless otherwise specified. The day of the vaginal plug was considered d 0.5 p.c., and mice were killed between 0700 h and 0900 h on d 2–3 p.c.

### Experimental Animals

All animal experimentation described was conducted in accord with accepted standards of humane animal care. Protocols for animal work were approved by the Harvard University Institutional Committee on Animal Care.

### Western Blot Analysis

Uteri and spleens were pooled from groups of at least three wild-type or mutant ovariectomized mice at 0, 1, 3, and 6 h after P4 injection and placed in cold RIPA (radioimmunoprecipitation) buffer containing protease inhibitor cocktail (50  $\mu$ l of 25 $\times$  protease inhibitor cocktail per ml RIPA buffer, Roche, Indianapolis, IN) on ice. Tissues were then homogenized by polytron, centrifuged at 14  $\times$  g at 4 C for 10 min; supernatant protein was quantitated by Bradford assay (Bio-Rad Laboratories, Inc., Hercules, CA), and then stored at –80 C. Unless otherwise noted, 25  $\mu$ g protein samples were analyzed by 10% SDS-PAGE. After nitrocellulose transfer and blocking overnight at 4 C in 5% nonfat milk, membranes

were incubated in affinity-purified rabbit polyclonal anti-*Hoxa-10* antibody at 1:300 dilution for 1 h at room temperature (RT), washed with  $1 \times$  Tris-buffered saline with Tween 20 ( $3 \times 10$  min), incubated with goat antirabbit (horseradish peroxidase) secondary antibody (Pharmacia Biotech, Piscataway, NJ), washed with Tris-buffered saline with Tween 20, and incubated in enhanced chemiluminescence for 1 min (Bio-Rad Laboratories, Inc.) followed by film development. *Hoxa-10* polyclonal antibody was raised in rabbits against the MAP peptide H-EEAHASSAAEELSPAPSE-8-MAP (Research Genetics, Inc., Huntsville, AL), which corresponded to a sequence in the mouse *Hoxa-10* C terminus, and affinity purified using antigen-bound Affygel-10 (Bio-Rad Laboratories, Inc.).

### RNA Isolation and Oligonucleotide Microarray Hybridization

Groups of four wild-type and four *Hoxa-10* mutant mice (SvJ background) at 10–16 wk of age were ovariectomized. Fourteen days later, P4 (Sigma, St. Louis, MO) dissolved in sesame oil (Sigma) was injected sc (2 mg/mouse in 100  $\mu$ l), after which the animals were killed and uterine horns removed at 6 h after injection. Care was taken to exclude the region of homeotic transformation at the uterine-oviductal junction (proximal ~25% of each uterine horn) (3). Fat and mesentery were trimmed. Tissues were snap frozen in liquid  $N_2$ , pooled, and homogenized by mortar in  $N_2$ . Total RNA was extracted using Trizol (Life Technologies, Inc., Gaithersburg, MD) according to the manufacturer's protocol, quantified by UV spectroscopy, and stored in diethylpyrocarbonate water (Ambion, Inc., Austin, TX) in 1- $\mu$ g/ $\mu$ l aliquots at  $-80^\circ\text{C}$ . A portion (0.5  $\mu$ g) of each RNA sample was analyzed on a 2% agarose gel to confirm integrity. Prechip validation of RNA collected via the OVX/P4/6 h protocol was performed by assaying for up-regulation of *Hoxa-10*, *Hoxa-11* (7), and *Histidine decarboxylase* (48) as markers of P4 efficacy.

Reverse transcription used oligo-dT followed by *in vitro* transcription and biotin labeling of cRNA (Enzo Biochem, Farmingdale, NY). All cRNA samples were analyzed with a Bioanalyser 2100 (Agilent Technologies, Wilmington, DE) before chip hybridization. Fragmented, labeled cRNA (20  $\mu$ g) was hybridized to Affymetrix U74A version 2 mouse oligonucleotide arrays, which were washed and scanned per Affymetrix protocol. Control samples were prepared and analyzed similarly except that sesame oil vehicle (OVX/oil/6 h) rather than P4 was injected. Triplicate pairs of wild-type and mutant samples were prepared, and *in vitro* transcription was performed in parallel for each of OVX/P4/6 h and OVX/oil/6 h RNA collections.

### Data Analysis for OVX/P4/6 h Wild-Type vs. Mutant Comparison

Intensity and cell data were obtained using MAS 4.0.1 (Affymetrix). Data were normalized and analyzed using dChip (11) to obtain model-based expression levels for each probe set, upon which all subsequent analyses were performed. Criteria for significant differential expression levels between wild type and mutant were: a fold change in expression of at least 1.5, *P* value of at least 0.1 (based on a *t* test or other tests), and an absolute difference in expression of at least 75 U. Paired and unpaired *t* tests were performed using Excel (Office 2000, Microsoft Corp.). Expression levels from dChip were also analyzed by SAM, an Excel add-in developed by Tusher et al. (13), that uses a variant of the *t* statistic and a permutation analysis to estimate the false positive rate within a set of significantly up- or down-regulated genes. These false positive rates take multiple hypothesis testing into account. When using paired tests with a 1.5-fold cutoff threshold and a median false detection rate of 10%, the SAM algorithm yielded similar lists of genes to those using con-

ventional *t* statistics. DRGs were classified according to their described functions based on a literature search of PubMed (<http://www.ncbi.nlm.nih.gov/PubMed/>). A DRG was placed in more than one category if multiple functions are described.

### Real-Time RT-PCR

Separate aliquots of total RNA from the chip experiments were stored at  $-80^\circ\text{C}$ . In the physiological pregnancy model, d 3.5 p.c. total uterine RNA was pooled from one or two wild-type or mutant mice. Samples were treated with deoxyribonuclease I using the DNA-free kit (Ambion, Inc.) and diluted to 20 ng/ $\mu$ l. Reverse transcription and quantitative PCR were performed with Superscript II reverse transcriptase (RT) and *Taq* polymerase in the One Step RT-PCR kit (Life Technologies, Inc.) on the iCycler (Bio-Rad Laboratories, Inc.). No RNA and negative RT controls (no RT, *Taq* polymerase only) were included in each set of RT-PCR experiments. All samples that would be compared were tested in the same RT-PCR run. Primer and fluorescence resonance energy transfer probe sequences were designed using Primer Express 1.0 (PE Applied Biosystems, Norwalk, CT), purchased, or extracted from published literature. All primers were from Invitrogen (San Diego, CA) and all fluorescence resonance energy transfer probes with 5'-FAM and 3' black hole quencher labels were from BioSource Technologies, Inc. (Vacaville, CA). Sequences of primer and probe sets are listed in the supplemental data (Ref. 12 and published on The Endocrine Society's Journals Online web site, <http://mend.endojournals.org>). Threshold cycle numbers were obtained using iCycler software version 2.3 (Bio-Rad Laboratories, Inc.). Conditions for amplification were: RT cycle at  $50^\circ\text{C}$  for 15 min, 1 cycle of  $95^\circ\text{C}$  for 2 min, 35 cycles of  $95^\circ\text{C}$  for 15 sec,  $59^\circ\text{C}$  for 15 sec, and  $72^\circ\text{C}$  for 15 sec. Quantitative RT-PCR was performed in triplicate with total uterine RNA (CLONTECH Laboratories, Inc., Palo Alto, CA) as a positive control. RNA expression levels were quantitated by comparing threshold cycles of the samples against the standard curve generated by positive controls. The experiment was valid if the negative RT controls had fluorescence intensity signals that were 100-fold less than experimental samples and if the size of the PCR products was verified by gel electrophoresis. RNA expression levels from the ovariectomized/injection model were normalized to *Rpl-7* as a control (40), and samples from d 2.5 p.c. and d 3.5 p.c. were normalized to 18S.

### RNA Sample Preparation for P4 Time Series

The mice used for the wild-type P4 time series were of 129/SvImJ background (The Jackson Laboratory, Bar Harbor, ME). In the wild-type P4 time series, total uterine RNA was extracted from ovariectomized mice at 0 (no injection), 1, 3, 6, 9, 12, 15, 18, and 24 h after P4 injection. Samples containing pooled total uterine RNA from at least four mice were used for each time point. The time course dataset was generated in two sets (0, 1, 3, 6, 9 h) and (0, 6, 12, 15, 18, 24 h). Samples in the same batch were processed in parallel at all steps, including ovariectomy, P4 injection, RNA collection, *in vitro* translation labeling, and chip hybridization. Time points of 0 h and 6 h were acquired in both batches to allow comparison between batches. The correlation between duplicates (at 0 h and 6 h) was much higher ( $r^2 > 0.975$ ) than that among samples within the same batch. Therefore, all time points were merged into one dataset for analysis.

### SOM Analysis of Gene Expression in P4 Response Time Series

dChip expression levels from experiments using wild-type ovariectomized mice at nine time points (0, 1, 3, 6, 9, 12, 15, 18, and 24 h) after P4 injection were used, and only genes with at least a 2-fold change and absolute signal change of at

least 75 U between any two time points were included in the SOM analysis (Genecluster, Whitehead Genome Center, Massachusetts Institute of Technology, Boston, MA) (15). Expression profiles for 1675 genes fulfilling these criteria were normalized before clustering so that the expression profile of each gene has mean 0 and variance 1 on the log scale. The number of nodes was incrementally increased until no further expression patterns emerged. A 3 × 6 geometry of nodes is depicted in the supplemental data published on the Endocrine Society's Journals Online web site, <http://mend.endojournals.org> (12). Clustering by SOM was also performed by using a 1.5-fold cutoff filter, with similar qualitative results.

### Statistical Methods for Determining Functional Category Enrichment

A hypergeometric distribution was used to calculate the probability of observing the number of DRGs within each cluster in the time series. The probability  $P$  of observing at least  $k$  DRGs within a cluster of size ( $n$ ) is:

$$P = 1 - \sum_{i=0}^{k-1} \frac{\binom{f}{i} \binom{g-f}{n-i}}{\binom{g}{n}}$$

where ( $f = 119$ ) is the total number of probe sets representing DRGs and ( $g = 12,386$ ) is the number of probe sets representing interrogated genes on the Affymetrix U74Av2 array. Alternatively, we also calculated  $P$  values based only on the subset of genes which passed the filtering for inclusion into the SOM clustering algorithm so that  $f = 67$  and  $g = 1675$ . A Bonferonni correction for multiple tests ( $m = 18$ , the number of clusters) was used to obtain an adjusted  $P$  value cutoff ( $\alpha'$ ) for a chosen target significance level ( $\alpha = 0.05$ ) according to the following equation:  $\alpha' = 1 - (1 - \alpha)^{1/(m-1)}$  (Cheung K. J., V. Badarinarayana, D. Selinger, D. Janse, and G. M. Church, submitted manuscript). Setting  $\alpha = 0.05$  and  $m = 18$ ;  $\alpha'$  is 0.0030.

### In Situ Hybridization and Immunohistochemistry

Uteri were cut into 4–6 mm pieces and flash frozen in Histo-Freeze (Fisher Scientific, Pittsburgh, PA). Frozen sections (11  $\mu$ m) were mounted onto poly-L-lysine coated slides and fixed in cold 4% paraformaldehyde in PBS. Sections were prehybridized and hybridized at 45 C for 4 h in 50% formamide hybridization buffer containing the  $^{35}$ S-labeled antisense cRNA probe (specific activities  $\sim 2 \times 10^9$  dpm/ $\mu$ g). After hybridization and washing, sections were incubated with ribonuclease A (20  $\mu$ g/ml) at 37 C for 20 min. Ribonuclease A-resistant hybrids were detected by autoradiography using Kodak NTB-2 liquid emulsion (Eastman Kodak Co., Rochester, NY). Sections hybridized with the corresponding sense probe served as negative controls. Slides were poststained with hematoxylin and eosin.  $^{35}$ S-labeled riboprobes were generated using specific RNA polymerases. An IMAGE clone of *p15* in pCMV-SPORT6 (IMAGE clone 3495097, Genbank accession no. BC002010) was purchased from Research Genetics, Inc. (Huntsville, AL) and confirmed by sequencing. Plasmid for the *p57* riboprobe was a generous gift from Dr. Stephen Elledge.

For immunohistochemistry, uteri were cut into 4–6 mm pieces and flash frozen in Histo-Freeze (Fisher Scientific, Pittsburgh, PA). Frozen sections (12  $\mu$ m) were mounted onto poly-L-lysine coated slides and fixed in Bouin's fixative and washed in PBS. Immunostaining with the primary antibody (anti-CD4, H129.9, PharMingen, San Diego, CA) was performed using a Histostain kit from Zymed Laboratories, Inc. (South San Francisco, CA) following the manufacturer's protocol.

### Flow Cytometric Analysis of USCs and Splenocytes

USCs were isolated from groups of four to five wild-type and *Hoxa-10* mutant mice on d 2.5 p.c. or d 3.5 p.c. as specified. In each group, uteri excluding the utero-oviductal junction were excised, trimmed of fat and mesentery, rinsed in PBS, flushed of embryos, pooled, and minced into fine fragments. Four rounds of 5-min incubation using collagenase type I (Sigma), mechanical disruption by pipetting, and 5-min sedimentation by gravity followed by removal of supernatant were performed in serum-free DMEM/F-12 (Life Technologies, Inc.) containing 1% penicillin-streptomycin (Sigma). Supernatant containing isolated USCs was passed through a 70- $\mu$ m cell strainer [Falcon (BD Biosciences, Bedford, MA)] to remove cell clumps. Cell suspensions were centrifuged at 1400 rpm, 4 C, for 5 min, and USCs were resuspended in fluorescence-activated cell sorting (FACS) buffer (PBS, 0.5% BSA, 0.02% sodium azide) on ice.

Spleens were removed and pooled from the same groups of mice and kept in PBS with 5% fetal calf serum on ice. Splenocytes were prepared by homogenization of the spleen capsule using the plunger end of a syringe, passed through a 70- $\mu$ m cell strainer, and suspended in PBS containing 5% fetal calf serum. Cells were pelleted by centrifugation (1800 rpm, 4 C, 5 min), resuspended in ACK buffer (0.15 M  $\text{NH}_4\text{Cl}$ , 1.0 mM  $\text{KHCO}_3$ , and 0.1 mM  $\text{Na}_2\text{EDTA}$ ) for 5 min to lyse red blood cells, repelleted by centrifugation, and resuspended in FACS buffer. A suspension of USCs or splenocytes (100  $\mu$ l) was incubated with normal rabbit serum (PharMingen) at 1:50 dilution for 5 min on ice, followed by centrifugation and aspiration of supernatant. Cell pellets were resuspended in 50  $\mu$ l of directly fluorochrome-conjugated monoclonal antibodies diluted in FACS buffer to a concentration of 0.1 mg/ml for 30 min in the dark on ice. Cells were washed twice in FACS buffer and analyzed on a FACScan (Becton Dickinson and Co.) with Cellquest software within 2 h of staining. The monoclonal antibodies used were (BD PharMingen): fluorescein isothiocyanate (FITC)-anti- $\gamma$   $\delta$  TCR (GL3), FITC-anti-TCR  $\beta$  (H57–597), FITC-anti-Pan-NK (DX5), FITC-anti-CD19 (1D3), FITC-anti-CD4 (H129.9), PE-anti- $\gamma$   $\delta$  TCR (GL3), PE-anti-TCR  $\beta$  (H57–597), PE-anti-Pan-NK (DX5), PE-anti-CD19 (1D3), and PE-anti-CD4 (H129.9).

### Cell Proliferation

Four hours before the mice were killed, 100  $\mu$ l (1 mg) of BrdU (BD Biosciences) was injected ip into each mouse. Cell staining was performed as above followed by cell fixing, permeabilization, deoxyribonuclease treatment, and BrdU staining using the BrdU Flow Kit (BD Biosciences) according to the manufacturer's protocol. Fixed and stained cells were kept in FACS buffer in 4 C overnight and analyzed by FACS the next morning.

### Acknowledgments

We thank S. Stowell, S. Heaney; J. Shan, and W. Lu; J. Couget (Harvard Center for Genomics Research) for assistance with Affymetrix chip hybridizations; S. K. Dey, J. Comander, and S. Mok for valuable discussions; C. Mak, L. Wu, M. Ramoni, and I. Kohane for advice on statistics; and D. Gould and J. LaVecchio for help with flow cytometry.

Received August 20, 2002. Accepted December 16, 2002.

Address all correspondence and requests for reprints to: Richard Maas, M.D., Ph.D., Division of Genetics, Department of Medicine, Brigham & Women's Hospital and Harvard Medical School, Thorn Building, Room 1019, 20 Shattuck Street, Boston, Massachusetts 02115. E-mail: [maas@rascal.med.harvard.edu](mailto:maas@rascal.med.harvard.edu).



This work was supported by NIH Grants RO-1HD-35580 (to R.M.), RO-1HD-40810 (to H.L.), K12-HD-01255 (to D.S.), Department of Energy Grant DE-FG02-7-ER60565 (to G.C.), and an American College of Obstetricians and Gynecologists-Ortho-McNeil Pharmaceutical Corp. Research Fellowship (to M.Y.).

\* Present Address: Department of Obstetrics and Gynecology, Columbia University College of Physicians and Surgeons, New York, NY 10032.

## REFERENCES

1. <http://www.asrm.org/Patients/faqs.html> (and material therein)
2. Paria BC, Reese J, Das, SK, Dey SK 2002 Molecular signaling in uterine receptivity for implantation. *Science* 296:2185–2188
3. Ma L, Yao M, Maas RL 1999 Genetic control of uterine receptivity during implantation. *Semin Reprod Endocrinol* 17:205–216
4. Benson GV, Nguyen ET-H, Maas RL 1995 The expression pattern of the murine *hoxa-10* gene and its sequence recognition of its homeodomain reveal specific properties of *Abdominal B*-like genes. *Mol Cell Biol* 15: 1591–1601
5. Satokata I, Benson G, Maas R 1995 Sexually dimorphic sterility phenotypes in *Hoxa-10*-deficient mice. *Nature* 374:460–463
6. Benson GV, Lim H, Paria BC, Satokata I, Dey SK, Maas RL 1996 Mechanisms of reduced fertility in *Hoxa-10* mutant mice: uterine homeosis and loss of maternal *Hoxa-10* expression. *Development* 122:2687–2696
7. Ma L, Benson GV, Lim H, Dey SK, Maas RL 1998 *Abdominal B (AbdB) Hoxa* genes: regulation in adult uterus by estrogen and progesterone and repression in Müllerian duct by the synthetic estrogen diethylstilbestrol (DES). *Dev Biol* 197:141–154
8. Lim H, Ma L, Ma WG, Maas RL, Dey SK 1999 *Hoxa-10* regulates uterine stromal cell responsiveness to progesterone during implantation and decidualization in the mouse. *Mol Endocrinol* 13:1005–1017
9. Duboule D 1995 Vertebrate *Hox* genes and proliferation: an alternative pathway to homeosis? *Curr Opin Genet Dev* 5:525–528
10. Capecchi MR 1997 *Hox* genes and mammalian development. *Cold Spring Harbor Symp Quant Biol* 62:273–281
11. Li C, Wong WH 2001 Model-based analysis of oligonucleotide arrays: expression index computation and outlier detection. *Proc Natl Acad Sci USA* 98:31–36
12. Yao M, *et al.* 2002 Web supplement. <http://genetics.med.harvard.edu/~schoe/mylene/web.supplement/index.htm>
13. Tusher VG, Tibshirani R, Chu G 2001 Significance analysis of microarrays applied to the ionizing radiation response. *Proc Natl Acad Sci USA* 98:5116–5121
14. Furlong EEM, Andersen EC, Null B, White KP, Scott MP 2001 Patterns of gene expression during *Drosophila* mesoderm development. *Science* 293:1629–1633
15. Edgar R, Domrachev M, Lash AE 2002 Gene expression omnibus: NCBI gene expression and hybridization array data repository. *Nucleic Acids Res* 30:207–210
16. National Center for Biotechnology Information. Data series GSE108. Gene Expression Omnibus, <http://www.ncbi.nlm.nih.gov/geo/query/acc.cgi?acc=GSE108>
17. National Center for Biotechnology Information. Data series GSE109. Gene Expression Omnibus, <http://www.ncbi.nlm.nih.gov/geo/query/acc.cgi?acc=GSE109>
18. National Center for Biotechnology Information. Data series GSE106. Gene Expression Omnibus, <http://www.ncbi.nlm.nih.gov/geo/query/acc.cgi?acc=GSE106>
- 18a. National Center for Biotechnology Information. Data series GSE107. Gene Expression Omnibus, <http://www.ncbi.nlm.nih.gov/geo/query/acc.cgi?acc=GSE107>
19. Tamayo P, Slonim D, Mesirov J, Zhu Q, Kitareewan S, Dmitrovsky E, Lander ES, Golub TR 1999 Interpreting patterns of gene expression with self-organizing maps: methods and application to hematopoietic differentiation. *Proc Natl Acad Sci USA* 96:2907–2912
20. Tavazoie S, Hughes JD, Campbell MJ, Cho RJ, Church GM 1999 Systematic determination of genetic network architecture. *Nat Genet* 22:281–285
21. Gellon G, McGinnis W 1998 Shaping animal body plans in development and evolution by modulation of Hox expression patterns. *Bioessays* 20:116–125
22. Maconochie MK, Nonchev S, Studer M, Chan SK, Popperl H, Sham MH, Mann RS, Krumlauf R 1997 Cross-regulation in the mouse HoxB complex: the expression of Hoxb2 in rhombomere 4 is regulated by Hoxb1. *Genes Dev* 11:1885–1895
23. Taylor HS, Igarashi P, Olive DL, Arici A 1999 Sex steroids mediate *Hoxa11* expression in the human peri-implantation endometrium. *J Clin Endocrinol Metab* 84: 1129–1135
24. Yoshioka K-I, Matsuda F, Takakura K, Noda Y, Imakawa K, Sakai S 2000 Determination of genes involved in the process of implantation: application of GeneChip to scan 6500 genes. *Biochem Biophys Res Commun* 272: 531–538
25. Kao LC, Tulac S, Lobo S, Imani B, Yang JP, Germeyer A, Osteen K, Taylor RN, Lessey BA, Giudice LC 2002 Global gene profiling in human endometrium during the window of implantation. *Endocrinology* 143:2119–2138
26. Reese J, Das SK, Paria BC, Lim H, Song H, Matsumoto H, Knudtson KL, DuBois RN, Dey SK 2001 Global gene expression analysis to identify molecular markers of uterine receptivity and embryo implantation. *J Biol Chem* 276:44137–44145
27. Gething MJ 1999 Role and regulation of the ER chaperone BiP. *Semin Cell Dev Biol* 10:465–472
28. Medawar PB 1953 Some immunological and endocrinological problems raised by evolution of viviparity in vertebrates. *Symp Soc Exp Biol* 7:320–328
29. Arck PC, Ferrick DA, Steele-Norwood D, Egan PJ, Croitoru K, Carding SR, Dietl J, Clark DA 1999 Murine T cell determination of pregnancy outcome. *Cell Immunol* 196:71–79
30. Pasanen S, Ylikomi T, Palojoki E, Syvala H, Pelto-Huikko M, Tuohimaa P 1998 Progesterone receptor in the chicken bursa of Fabricius and thymus: evidence for expression in B-lymphocytes. *Mol Cell Endocrinol* 141: 119–128
31. Tibbetts TA, Conneely OM, O'Malley BW 1999 Progesterone via its receptor antagonizes the pro-inflammatory activity of estrogen in the mouse uterus. *Biol Reprod* 60:1158–1165
32. Malumbres M, Ortega S, Barbacid M 2000 Genetic analysis of mammalian cyclin-dependent kinases and their inhibitors. *Biol Chem* 381:827–838
33. Tan J, Raja S, Davis MK, Tawfik O, Dey SK, Das SK 2002 Evidence for coordinated interaction of cyclin D3 with p21 and cdk6 in directing the development of uterine stromal cell decidualization and polyploidy during implantation. *Mech Dev* 111:99–113
34. Bromleigh VC, Freedman LP 2000 p21 is a transcriptional target of HOXA10 in differentiating myelomonocytic cells. *Genes Dev* 14:2581–2586
35. Lawrence HJ, Sauvageau G, Ahmadi N, Lopez AR, LeBeau MM, Link M, Humphries K, Largman C 1995 Stage- and lineage-specific expression of the HOXA10 homeobox gene in normal and leukemic hematopoietic cells. *Exp Hematol* 23:1160–1166
36. Thorsteinsdottir U, Sauvageau G, Hough MR, Dragowska W, Lansdorp PM, Lawrence HJ, Largman C,

- Humphries RK 1997 Overexpression of HOXA10 in murine hematopoietic cells perturbs both myeloid and lymphoid differentiation and leads to acute myeloid leukemia. *Mol Cell Biol* 17:495–505
37. Gorivodsky M, Zemlyak I, Orenstein H, Savion S, Fein A, Torchinsky V, Toder J 1998 TNF- $\alpha$  messenger RNA and protein expression in the uteroplacental unit of mice with pregnancy loss. *J Immunol* 160:4280–4288
  38. Makrigiannakis A, Zoumakis E, Kalantaridou S, Coutifaris C, Margioris AN, Coukos G, Rice KC, Gravanis A, Chrousos GP 2001 Corticotropin-releasing hormone promotes blastocyst implantation and early maternal tolerance. *Nat Immunol* 2:1018–1024
  39. Munn DH, Zhou M, Attwood JT, Bondarev I, Conway SJ, Marshall B, Brown C, Mellor AL 1998 Prevention of allogeneic fetal rejection by tryptophan catabolism. *Science* 281:1191–1193
  40. Lydon JP, DeMayo FJ, Funk CR, Mani SK, Hughes AR, Montgomery CA, Shyamala G, Conneely OM, O'Malley BW 1995 Mice lacking progesterone receptor exhibit pleiotropic reproductive abnormalities. *Genes Dev* 9:2266–2278
  41. Xu J, Nawaz Z, Tsai SY, Tsai M-J, O'Malley BW 1996 The extreme C terminus of progesterone receptor contains a transcriptional repressor domain that functions through a putative corepressor. *Proc Natl Acad Sci USA* 93:12195–12199
  42. Giangrande PH, Kimbrel EA, Edwards DP, McDonnell DP 2000 The opposing transcriptional activities of the two isoforms of the human progesterone receptor are due to differential cofactor binding. *Mol Cell Biol* 20:3102–3115
  43. Mulac-Jericevic B, Mullinax RA, DeMayo FJ, Lydon JP, Conneely OM 2000 Subgroup of reproductive functions of progesterone mediated by progesterone receptor-B isoform. *Science* 289:1751–1754
  44. Appel B, Sakonju S 1993 Cell-type-specific mechanisms of transcriptional repression by the homeotic gene products UBX and ABD-A in *Drosophila* embryos. *EMBO J* 12:1099–1109
  45. Saleh M, Rambaldi I, Yang X-J, Featherstone MS 2000 Cell signaling switches HOX-PBX complexes from repressors to activators of transcription mediated by histone deacetylases and histone acetyltransferases. *Mol Cell Biol* 20:8623–8633
  46. Shi X, Bai S, Li L, Cao X 2001 *Hoxa-9* represses transforming growth factor- $\beta$ -induced osteopontin gene transcription. *J Biol Chem* 276:850–855
  47. Gendron RL, Paradis H, Hsieh-Li HM, Lee DW, Potter SS, Markoff E 1997 Abnormal uterine stromal and glandular function associated with maternal reproductive defects in *Hoxa-11* null mice. *Biol Reprod* 56:1097–1105
  48. Paria BC, Das N, Das SK, Zhao X, Dileepan KN, Dey SK 1998 Histidine decarboxylase gene in the mouse uterus is regulated by progesterone and correlates with uterine differentiation for blastocyst implantation. *Endocrinology* 139:3958–3966

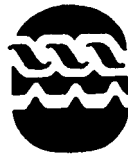

Source: http://academic.oup.com/mend/article-pdf/17/4/610/8966197/mend0610.pdf
